# Supplementary material for: miR-204-5p Hampers Breast Cancer Malignancy and Affects the Cell Cycle by Targeting PRR11
Source: Hindawi journal article supplement (doi:10.1155/2022/4010947), 2022-01-27
Supplement: f1 [file 4010947.f1.pdf]

| logFC    | logCPM   | PValue   | FDR       |                       |  |
|----------|----------|----------|-----------|-----------------------|--|
| CKM      | -8.29264 | 5.273382 | 0         | 0                     |  |
| ACTA1    | -6.96675 | 6.353376 | 0         | 0                     |  |
| MYLPF    | -6.92134 | 2.435437 | 0         | 0                     |  |
| PYGM     | -6.90155 | 3.914164 | 0         | 0                     |  |
| SLN      | -6.43701 | 1.785647 | 0         | 0                     |  |
| ACTN3    | -6.31807 | 0.92959  | 0         | 0                     |  |
| TNNC2    | -6.30904 | 2.991272 | 0         | 0                     |  |
| KLHL41   | -6.26466 | 3.118321 | 0         | 0                     |  |
| ATP2A1   | -6.11397 | 3.86939  | 0         | 0                     |  |
| TNNC1    | -6.10456 | 2.903016 | 0         | 0                     |  |
| NEB      | -6.03075 | 5.094682 | 0         | 0                     |  |
| MYL3     | -6.02176 | 1.628154 | 0         | 0                     |  |
| APOBEC2  | -5.97843 | 0.324523 | 0         | 0                     |  |
| GLYAT    | -5.92594 | 1.564602 | 0         | 0                     |  |
| MYOT     | -5.83551 | 2.094698 | 0         | 0                     |  |
| LDB3     | -5.4826  | 3.260799 | 0         | 0                     |  |
| TNNI1    | -5.39937 | 3.538512 | 0         | 0                     |  |
| UNC45B   | -5.31542 | -0.18535 | 0         | 0                     |  |
| ACVR1C   | -5.22633 | 3.327873 | 0         | 0                     |  |
| KCNIP2   | -5.14929 | 4.116978 | 0         | 0                     |  |
| HSPB7    | -5.09124 | 4.100154 | 0         | 0                     |  |
| HSD17B13 | -5.0893  | 0.292241 | 0         | 0                     |  |
| LVRN     | -5.08428 | 1.421459 | 0         | 0                     |  |
| FHL1     | -5.01143 | 7.303103 | 0         | 0                     |  |
| LYVE1    | -4.95768 | 3.748422 | 0         | 0                     |  |
| HBB      | -4.927   | 4.978727 | 0         | 0                     |  |
| TTN      | -4.91579 | 5.824285 | 0         | 0                     |  |
| VEGFD    | -4.90328 | 2.090695 | 0         | 0                     |  |
| LPL      | -4.73084 | 7.179904 | 0         | 0                     |  |
| KLB      | -4.72593 | 2.694575 | 0         | 0                     |  |
| MYOM1    | -4.68206 | 3.29545  | 0         | 0                     |  |
| SLC2A4   | -4.64666 | 2.412824 | 0         | 0                     |  |
| HSPB6    | -4.55668 | 5.048999 | 0         | 0                     |  |
| LIPE     | -4.55446 | 5.994093 | 0         | 0                     |  |
| GPAM     | -4.44799 | 6.409273 | 0         | 0                     |  |
| ENO3     | -4.38514 | 3.913535 | 0         | 0                     |  |
| SRL      | -4.32722 | 1.406819 | 0         | 0                     |  |
| RDH5     | -4.28571 | 1.418448 | 0         | 0                     |  |
| GYG2     | -4.14051 | 5.309035 | 0         | 0                     |  |
| ITIH5    | -4.02178 | 5.718658 | 0         | 0                     |  |
| BTNL9    | -4.01698 | 4.147738 | 0         | 0                     |  |
| AOC3     | -3.98297 | 6.39869  | 0         | 0                     |  |
| CLEC3B   | -3.90983 | 3.953569 | 0         | 0                     |  |
| CRHBP    | -3.89055 | 0.182944 | 0         | 0                     |  |
| KLHL31   | -3.84471 | 2.305035 | 0         | 0                     |  |
| ACSM5    | -3.75842 | 1.940194 | 0         | 0                     |  |
| SORBS1   | -3.68167 | 6.858699 | 0         | 0                     |  |
| ACACB    | -3.66749 | 6.031407 | 0         | 0                     |  |
| ITGA7    | -3.66638 | 4.966533 | 0         | 0                     |  |
| NPR1     | -3.61398 | 4.374327 | 0         | 0                     |  |
| CAV1     | -3.399   | 7.238304 | 0         | 0                     |  |
| TNS1     | -3.11441 | 8.058378 | 0         | 0                     |  |
| NIPSNAP3 | -2.89355 | 1.601564 | 0         | 0                     |  |
| GSN      | -2.54445 | 9.357328 | 0         | 0                     |  |
| SIK2     | -2.46193 | 6.050483 | 0         | 0                     |  |
| SYPL2    | -3.58721 | 0.862377 | 1.5612474 | 5.05957805936645e-319 |  |
| EBF1     | -3.07757 | 4.342476 | 2.9248686 | 9.31234691907415e-319 |  |

|          |          |          |           |                       |
|----------|----------|----------|-----------|-----------------------|
| LRRC2    | -3.85999 | 0.708608 | 1.7239264 | 5.39410644476538e-315 |
| PDE2A    | -3.13658 | 3.906538 | 3.3102348 | 1.01820580864332e-314 |
| CA3      | -5.84291 | 4.49014  | 1.2728649 | 3.84999206533959e-313 |
| MMD      | -2.85065 | 4.953927 | 1.8745913 | 5.57706299667825e-311 |
| CAV2     | -2.92006 | 5.585064 | 8.8119426 | 0.00E+00              |
| PPP1R27  | -5.76733 | -0.57765 | 1.2346719 | 0.00E+00              |
| SLC16A7  | -3.39294 | 3.742096 | 4.2252307 | 0.00E+00              |
| ABCD2    | -4.12773 | 1.93561  | 6.9650956 | 0.00E+00              |
| SYNE3    | -3.01996 | 4.566968 | 9.4202994 | #####                 |
| PPARG    | -3.39719 | 4.18343  | #####     | #####                 |
| PAMR1    | -3.52175 | 3.681182 | #####     | #####                 |
| MYH2     | -8.51809 | 5.746636 | #####     | #####                 |
| CFL2     | -2.23127 | 4.522745 | #####     | #####                 |
| TNXB     | -4.06591 | 5.445467 | #####     | #####                 |
| NAALAD2  | -2.90813 | 0.979232 | #####     | #####                 |
| SPTBN1   | -2.04978 | 8.631373 | #####     | #####                 |
| ASPA     | -3.59187 | 1.439144 | #####     | #####                 |
| CKMT2    | -3.5643  | 1.816563 | #####     | #####                 |
| CAVIN2   | -3.9579  | 4.539062 | #####     | #####                 |
| ARHGAP2  | -3.09862 | 2.185599 | #####     | #####                 |
| PALMD    | -2.9028  | 5.41281  | #####     | #####                 |
| FAM13A   | -2.4625  | 4.82013  | #####     | #####                 |
| AC009779 | -2.33607 | 0.429698 | #####     | #####                 |
| PLIN1    | -5.32086 | 7.139141 | #####     | #####                 |
| ALDH1L1  | -4.74184 | 3.232861 | #####     | #####                 |
| FZD4     | -2.68525 | 6.177037 | #####     | #####                 |
| PDE3B    | -3.80608 | 3.996462 | #####     | #####                 |
| GPD1     | -5.30327 | 6.474028 | #####     | #####                 |
| GPX3     | -3.69172 | 7.272092 | #####     | #####                 |
| AQP7     | -5.1511  | 4.082039 | #####     | #####                 |
| CAT      | -2.03756 | 6.79802  | #####     | #####                 |
| PLIN4    | -5.18963 | 8.004756 | #####     | #####                 |
| ABRA     | -6.70048 | -0.63482 | #####     | #####                 |
| MTURN    | -2.56206 | 5.967707 | #####     | #####                 |
| MYOZ1    | -4.76587 | 2.652    | #####     | #####                 |
| KIAA0408 | -4.46593 | -2.13245 | #####     | #####                 |
| SLC19A3  | -5.03166 | 4.246849 | #####     | #####                 |
| FBP2     | -5.10299 | -0.36049 | #####     | #####                 |
| GPR146   | -2.78441 | 0.923874 | #####     | #####                 |
| IGFBP6   | -3.23096 | 4.238581 | #####     | #####                 |
| ADAMTS5  | -3.06854 | 4.624121 | #####     | #####                 |
| ASB11    | -6.20882 | -1.86008 | #####     | #####                 |
| LMOD3    | -5.09773 | 0.918342 | #####     | #####                 |
| CCDC69   | -2.97275 | 5.227211 | #####     | #####                 |
| TMEM37   | -3.0169  | 4.110934 | #####     | #####                 |
| ACO1     | -2.04273 | 6.006435 | #####     | #####                 |
| GPBAR1   | -2.98077 | 0.199088 | #####     | #####                 |
| SVEP1    | -3.28831 | 5.552851 | #####     | #####                 |
| KLHL33   | -3.96048 | -2.07472 | #####     | #####                 |
| LEP      | -6.16636 | 5.340109 | #####     | #####                 |
| AL845331 | -5.28271 | -1.32219 | #####     | #####                 |
| TNNI2    | -4.89864 | 2.836221 | #####     | #####                 |
| MYBPC2   | -5.67967 | 2.025164 | #####     | #####                 |
| SCARA5   | -5.09029 | 3.855394 | #####     | #####                 |
| CHRD1    | -4.45395 | 5.632221 | #####     | #####                 |
| ABCA9    | -3.62374 | 3.418259 | #####     | #####                 |
| FRMD1    | -4.36367 | -0.2159  | #####     | #####                 |
| MYZAP    | -3.23819 | 2.355287 | #####     | #####                 |

|          |          |          |       |       |
|----------|----------|----------|-------|-------|
| PFKFB1   | -3.58206 | 1.629817 | ##### | ##### |
| FXYD1    | -3.58819 | 0.321245 | ##### | ##### |
| HCAR2    | -3.44426 | 1.769473 | ##### | ##### |
| PPP1R12B | -2.08593 | 6.03991  | ##### | ##### |
| DMGDH    | -2.7859  | 1.146383 | ##### | ##### |
| LEPR     | -2.97084 | 4.303464 | ##### | ##### |
| SH3D19   | -2.01741 | 6.288611 | ##### | ##### |
| NRAP     | -7.2384  | 3.356926 | ##### | ##### |
| RBP4     | -4.88665 | 4.984937 | ##### | ##### |
| EPB42    | -3.59039 | -0.91416 | ##### | ##### |
| CD300LG  | -5.02318 | 3.449109 | ##### | ##### |
| OXTR     | -4.08799 | 5.144787 | ##### | ##### |
| TRDN     | -6.18907 | 2.250765 | ##### | ##### |
| ANGPT4   | -3.48076 | -0.25243 | ##### | ##### |
| MYOZ2    | -4.74416 | -0.53176 | ##### | ##### |
| HEPACAM  | -5.25688 | 0.227561 | ##### | ##### |
| MYLK2    | -4.29401 | 0.435448 | ##### | ##### |
| ADRA1A   | -4.47106 | -0.1916  | ##### | ##### |
| HBA2     | -4.43957 | 2.442947 | ##### | ##### |
| DDR2     | -2.68473 | 6.290972 | ##### | ##### |
| CASQ1    | -4.68383 | 2.65164  | ##### | ##### |
| SPX      | -5.21682 | 2.341088 | ##### | ##### |
| NMUR1    | -3.47908 | 0.354117 | ##### | ##### |
| CD36     | -4.194   | 7.853992 | ##### | ##### |
| TIMP4    | -4.52677 | 3.818735 | ##### | ##### |
| PCOLCE2  | -4.61691 | 4.170785 | ##### | ##### |
| MAP1LC3b | -3.74648 | 0.174804 | ##### | ##### |
| MOCS1    | -2.16902 | 4.350647 | ##### | ##### |
| G0S2     | -4.07787 | 5.084196 | ##### | ##### |
| DPT      | -3.52782 | 6.255819 | ##### | ##### |
| ADH1A    | -4.78256 | -1.49328 | ##### | ##### |
| 1-Mar    | -2.7499  | 4.796213 | ##### | ##### |
| CD34     | -2.12989 | 6.511166 | ##### | ##### |
| ANKRD53  | -2.7061  | 0.254981 | ##### | ##### |
| PLXNA4   | -3.33854 | 4.263839 | ##### | ##### |
| CDO1     | -3.64702 | 3.197063 | ##### | ##### |
| C1QTNF9  | -3.66062 | -1.37099 | ##### | ##### |
| TCAP     | -4.6912  | 2.982664 | ##### | ##### |
| LRRN4CL  | -3.3506  | 2.090731 | ##### | ##### |
| CCDC3    | -2.82907 | 4.961982 | ##### | ##### |
| DHRS7C   | -7.39692 | -2.45136 | ##### | ##### |
| SCN4A    | -3.58864 | 2.12768  | ##### | ##### |
| COX6A2   | -6.21938 | 0.29707  | ##### | ##### |
| SLC7A10  | -4.73566 | 1.655951 | ##### | ##### |
| ABCA8    | -3.89932 | 4.200473 | ##### | ##### |
| ACTN2    | -5.89945 | 4.165084 | ##### | ##### |
| NKAPL    | -2.70811 | -0.82059 | ##### | ##### |
| GHR      | -3.14365 | 5.04317  | ##### | ##### |
| ACSL1    | -2.80645 | 7.498061 | ##### | ##### |
| PDK4     | -3.5932  | 6.693748 | ##### | ##### |
| BHMT2    | -3.17446 | 2.701018 | ##### | ##### |
| MCAM     | -2.19052 | 7.251599 | ##### | ##### |
| KLF15    | -3.38493 | 2.040104 | ##### | ##### |
| ALPK3    | -2.52858 | 3.693684 | ##### | ##### |
| SLC17A7  | -3.00117 | 0.489982 | ##### | ##### |
| SEMA3G   | -2.85824 | 5.308773 | ##### | ##### |
| GPIHBP1  | -3.52489 | 2.836677 | ##### | ##### |
| LDB2     | -2.15146 | 4.313403 | ##### | ##### |

|         |          |          |       |       |
|---------|----------|----------|-------|-------|
| TNNT3   | -5.17826 | 3.389845 | ##### | ##### |
| FABP4   | -4.91056 | 7.748034 | ##### | ##### |
| CIDEC   | -5.3037  | 5.247476 | ##### | ##### |
| GALNT15 | -3.21662 | 4.321055 | ##### | ##### |
| CA4     | -5.28839 | 1.515253 | ##### | ##### |
| GYS2    | -4.82652 | -1.16601 | ##### | ##### |
| EBF3    | -2.75808 | 2.753872 | ##### | ##### |
| DEFB132 | -4.89468 | 1.088262 | ##### | ##### |
| AMPD1   | -4.46353 | 0.739916 | ##### | ##### |
| LMOD1   | -2.65695 | 5.212206 | ##### | ##### |
| ABCA10  | -3.35975 | 2.0202   | ##### | ##### |
| TMEM132 | -4.72178 | 2.909377 | ##### | ##### |
| MYOM3   | -3.09896 | 1.500058 | ##### | ##### |
| MYMX    | -3.47236 | -0.2326  | ##### | ##### |
| LGALS12 | -4.52649 | 3.09919  | ##### | ##### |
| GNG11   | -2.1799  | 5.060474 | ##### | ##### |
| ATP1A2  | -4.48486 | 3.930013 | ##### | ##### |
| MYL2    | -7.96627 | 4.105565 | ##### | ##### |
| GNAI1   | -2.49946 | 4.309595 | ##### | ##### |
| ATOH8   | -3.29393 | 2.285698 | ##### | ##### |
| ADRB2   | -2.8303  | 2.131224 | ##### | ##### |
| KCNA7   | -4.57434 | -2.07002 | ##### | ##### |
| DGAT2   | -3.34777 | 6.069077 | ##### | ##### |
| TMEM220 | -2.24759 | 2.186499 | ##### | ##### |
| CAPN3   | -2.95958 | 0.293541 | ##### | ##### |
| CPED1   | -2.90501 | 4.292398 | ##### | ##### |
| TGFBR2  | -2.22227 | 7.180448 | ##### | ##### |
| CLMP    | -2.43414 | 5.519747 | ##### | ##### |
| ADH1B   | -5.12401 | 7.39509  | ##### | ##### |
| CAV3    | -4.9216  | -1.77378 | ##### | ##### |
| LRRRC39 | -2.57499 | 0.531048 | ##### | ##### |
| SPRY2   | -2.44215 | 4.157756 | ##### | ##### |
| AKAP12  | -2.70179 | 5.751575 | ##### | ##### |
| ECM2    | -2.61969 | 5.115434 | ##### | ##### |
| CES1    | -3.79998 | 4.715325 | ##### | ##### |
| PLAC9   | -3.10797 | 3.132843 | ##### | ##### |
| ANGPTL5 | -4.10609 | -1.49167 | ##### | ##### |
| PDZD2   | -2.64766 | 5.217502 | ##### | ##### |
| SGK2    | -3.16779 | 1.42508  | ##### | ##### |
| CNN1    | -3.14448 | 5.282399 | ##### | ##### |
| DST     | -2.38545 | 8.140735 | ##### | ##### |
| MLXIPL  | -3.53651 | 2.572335 | ##### | ##### |
| DIPK2B  | -2.05792 | 4.732259 | ##### | ##### |
| MME     | -3.28955 | 5.827078 | ##### | ##### |
| KLF4    | -2.57422 | 5.459263 | ##### | ##### |
| LIFR    | -2.55361 | 5.741691 | ##### | ##### |
| DMD     | -3.01094 | 4.831342 | ##### | ##### |
| FAM180B | -4.01461 | -0.72159 | ##### | ##### |
| FLNC    | -3.05387 | 4.591692 | ##### | ##### |
| CASQ2   | -3.38689 | 1.798332 | ##### | ##### |
| DOCK11  | -2.35704 | 4.78684  | ##### | ##### |
| HHATL   | -5.10988 | -0.66221 | ##### | ##### |
| ADIPOQ  | -5.22378 | 6.981312 | ##### | ##### |
| NNAT    | -3.55857 | 1.985614 | ##### | ##### |
| LMOD2   | -6.74812 | 1.836692 | ##### | ##### |
| HJV     | -6.29403 | -0.70621 | ##### | ##### |
| MRAP    | -4.4893  | 0.418657 | ##### | ##### |
| LHFPL6  | -2.04542 | 5.579343 | ##### | ##### |

|           |          |          |       |       |
|-----------|----------|----------|-------|-------|
| MAMDC2    | -3.04035 | 3.327565 | ##### | ##### |
| STARD9    | -2.16434 | 3.571997 | ##### | ##### |
| PLSCR4    | -2.11496 | 4.761881 | ##### | ##### |
| TXNIP     | -2.05119 | 9.553819 | ##### | ##### |
| TYRO3     | -2.17603 | 3.998292 | ##### | ##### |
| CACNA1S   | -6.74607 | 0.879999 | ##### | ##### |
| TRIM63    | -4.07612 | -0.478   | ##### | ##### |
| IDI2      | -5.19492 | -2.98788 | ##### | ##### |
| ENPP2     | -2.73708 | 5.640273 | ##### | ##### |
| C14orf18C | -5.13998 | 1.717686 | ##### | ##### |
| PKHD1L1   | -3.67731 | 0.276372 | ##### | ##### |
| ANGPTL8   | -3.89917 | -0.813   | ##### | ##### |
| DTX1      | -2.47037 | 3.056239 | ##### | ##### |
| CORO2B    | -2.35834 | 2.354428 | ##### | ##### |
| PRRT4     | -3.64425 | 0.866319 | ##### | ##### |
| ANXA1     | -2.36268 | 7.710027 | ##### | ##### |
| SRPX      | -2.5188  | 4.594293 | ##### | ##### |
| CIDEA     | -4.96566 | 3.419771 | ##### | ##### |
| TRARG1    | -5.08337 | 5.184787 | ##### | ##### |
| F10       | -2.55979 | 1.631546 | ##### | ##### |
| LGI4      | -2.39828 | 2.025687 | ##### | ##### |
| PPP1R1A   | -3.89765 | 4.764992 | ##### | ##### |
| FBXO40    | -5.93955 | -0.54649 | ##### | ##### |
| GNG2      | -2.07984 | 4.537511 | ##### | ##### |
| SLIT3     | -2.41843 | 6.218738 | ##### | ##### |
| SHE       | -2.14321 | 3.50681  | ##### | ##### |
| FITM1     | -2.9423  | -0.69196 | ##### | ##### |
| COL10A1   | 7.125391 | 7.234902 | ##### | ##### |
| MMP11     | 6.248106 | 8.228427 | ##### | ##### |
| PCK1      | -4.93779 | 3.50193  | ##### | ##### |
| GPLD1     | -2.69005 | 1.026605 | ##### | ##### |
| CDH20     | -3.29936 | -1.05311 | ##### | ##### |
| CPA1      | -4.16846 | -1.41924 | ##### | ##### |
| ANGPTL1   | -3.07946 | 2.574261 | ##### | ##### |
| XIRP1     | -4.40359 | 2.736588 | ##### | ##### |
| VWF       | -2.09114 | 7.890198 | ##### | ##### |
| NEK2      | 4.237138 | 4.681873 | ##### | ##### |
| SCN4B     | -2.56439 | 3.690576 | ##### | ##### |
| GOLGA8M   | -2.84948 | -2.60363 | ##### | ##### |
| DWORF     | -7.6263  | -0.41066 | ##### | ##### |
| ABCA6     | -2.68249 | 3.311497 | ##### | ##### |
| NAT8L     | -3.22136 | 4.195945 | ##### | ##### |
| TRHDE     | -4.03389 | 0.20402  | ##### | ##### |
| GIPC2     | -2.65743 | 1.472673 | ##### | ##### |
| MYH11     | -3.20422 | 7.024347 | ##### | ##### |
| TBX15     | -2.28022 | 3.235963 | ##### | ##### |
| CEBPA     | -2.22966 | 4.502922 | ##### | ##### |
| SLC35G2   | -2.02847 | 2.038432 | ##### | ##### |
| CABP1     | -2.24608 | -0.36438 | ##### | ##### |
| PRKAR2B   | -2.49014 | 6.34686  | ##### | ##### |
| ABCC9     | -2.35376 | 4.069327 | ##### | ##### |
| ALDH2     | -2.30041 | 7.023022 | ##### | ##### |
| JAM2      | -2.07276 | 4.458748 | ##### | ##### |
| SMTNL1    | -3.3198  | 0.200351 | ##### | ##### |
| TMEM246   | -2.24612 | 1.788306 | ##### | ##### |
| YIPF7     | -3.70508 | -3.07826 | ##### | ##### |
| KLHL29    | -2.49091 | 2.820449 | ##### | ##### |
| LILRB5    | -2.81172 | 2.429502 | ##### | ##### |

|          |          |          |       |       |
|----------|----------|----------|-------|-------|
| LIMS2    | -2.00727 | 4.609801 | ##### | ##### |
| ALDH1A1  | -2.55036 | 5.148776 | ##### | ##### |
| COL6A6   | -3.22273 | 2.370419 | ##### | ##### |
| MUSTN1   | -3.48683 | -2.92151 | ##### | ##### |
| RBMS3    | -2.18003 | 4.358091 | ##### | ##### |
| CCL14    | -3.33037 | 1.763644 | ##### | ##### |
| HIF3A    | -3.72822 | 1.412413 | ##### | ##### |
| MRAS     | -2.23456 | 5.647824 | ##### | ##### |
| ANKRD2   | -3.4834  | -0.66463 | ##### | ##### |
| ATP1B4   | -5.79033 | -2.32351 | ##### | ##### |
| MAOA     | -3.31198 | 5.627076 | ##### | ##### |
| FAM228A  | -2.69343 | -1.87601 | ##### | ##### |
| KLHL40   | -7.08097 | -1.11684 | ##### | ##### |
| FMO2     | -3.24564 | 5.217618 | ##### | ##### |
| PDLIM3   | -2.42019 | 5.658951 | ##### | ##### |
| INSYN2B  | -3.81699 | 0.709227 | ##### | ##### |
| MMRN1    | -3.34196 | 3.53528  | ##### | ##### |
| DENND2A  | -2.19066 | 2.738607 | ##### | ##### |
| PID1     | -2.4868  | 3.02715  | ##### | ##### |
| TSLP     | -3.25226 | -0.14292 | ##### | ##### |
| BMX      | -2.70978 | 0.983574 | ##### | ##### |
| MASP1    | -3.59409 | 0.59082  | ##### | ##### |
| PEAR1    | -2.0371  | 3.313643 | ##### | ##### |
| MYH7     | -7.78369 | 5.548556 | ##### | ##### |
| SMYD1    | -4.90974 | 2.080881 | ##### | ##### |
| DES      | -4.79746 | 4.862162 | ##### | ##### |
| STX11    | -2.1696  | 2.293035 | ##### | ##### |
| MB       | -3.08297 | 5.674489 | ##### | ##### |
| CXCL2    | -3.42758 | 2.35531  | ##### | ##### |
| CAVIN4   | -2.96799 | 0.069344 | ##### | ##### |
| ANK2     | -2.3516  | 4.319866 | ##### | ##### |
| TSPAN7   | -2.49727 | 3.89599  | ##### | ##### |
| ANGPT1   | -2.79303 | 2.907131 | ##### | ##### |
| PALM2-AI | -2.81984 | -0.11888 | ##### | ##### |
| PREX2    | -2.32712 | 3.715593 | ##### | ##### |
| SAMD5    | -2.98383 | 3.14128  | ##### | ##### |
| FREM1    | -2.94862 | 2.655231 | ##### | ##### |
| CCDC178  | -3.01042 | -0.03492 | ##### | ##### |
| GNAL     | -2.07702 | 2.950403 | ##### | ##### |
| FHL5     | -2.6278  | 1.390696 | ##### | ##### |
| MGLL     | -2.23574 | 6.847932 | ##### | ##### |
| KIF4A    | 3.829014 | 4.769257 | ##### | ##### |
| MLIP     | -3.5969  | -0.16364 | ##### | ##### |
| PKMYT1   | 3.982971 | 4.279721 | ##### | ##### |
| SCTR     | -3.02835 | -2.02747 | ##### | ##### |
| EBF2     | -2.2839  | 2.445026 | ##### | ##### |
| MAB21L1  | -2.71167 | 1.028935 | ##### | ##### |
| KL       | -2.48771 | 1.550373 | ##### | ##### |
| SYNPO2   | -2.53937 | 6.228127 | ##### | ##### |
| CACHD1   | -2.115   | 4.296045 | ##### | ##### |
| MICU3    | -2.23202 | 1.360882 | ##### | ##### |
| S1PR1    | -2.04035 | 4.959126 | ##### | ##### |
| SPTB     | -2.65119 | 1.607433 | ##### | ##### |
| HSPB2    | -2.5336  | 0.66341  | ##### | ##### |
| AKR1C1   | -3.50025 | 4.259673 | ##### | ##### |
| PQLC2L   | -2.90929 | 0.895188 | ##### | ##### |
| FAM13C   | -2.2525  | 1.695342 | ##### | ##### |
| HRC      | -2.7056  | 1.092236 | ##### | ##### |

|          |          |          |       |       |
|----------|----------|----------|-------|-------|
| MYLK     | -2.21122 | 7.420981 | ##### | ##### |
| PCLAF    | 3.303339 | 4.260226 | ##### | ##### |
| FAM149A  | -2.13947 | 2.096145 | ##### | ##### |
| ALDH1A2  | -2.81953 | 2.172656 | ##### | ##### |
| SGCA     | -3.08926 | 0.245291 | ##### | ##### |
| CLIC5    | -2.4232  | 3.287846 | ##### | ##### |
| AQP1     | -2.11096 | 7.426105 | ##### | ##### |
| ITPRIPL1 | -2.37345 | 1.724    | ##### | ##### |
| CDKN1C   | -2.11042 | 4.189124 | ##### | ##### |
| AVPR2    | -2.76824 | 0.710647 | ##### | ##### |
| KY       | -3.31724 | -0.53241 | ##### | ##### |
| SPC25    | 2.802997 | 2.873493 | ##### | ##### |
| FSD2     | -3.6898  | -1.21344 | ##### | ##### |
| ASB5     | -6.09864 | -0.48316 | ##### | ##### |
| SYNM     | -3.09795 | 6.704435 | ##### | ##### |
| SOX17    | -2.19685 | 2.252001 | ##### | ##### |
| ABCB5    | -3.57649 | 0.051401 | ##### | ##### |
| IL17D    | -2.00759 | 0.894503 | ##### | ##### |
| HSD17B6  | 2.996046 | 2.422781 | ##### | ##### |
| HLF      | -2.8587  | 3.766447 | ##### | ##### |
| ASF1B    | 3.05122  | 4.744233 | ##### | ##### |
| COX7A1   | -2.49599 | 3.403035 | ##### | ##### |
| CETP     | -2.25358 | 1.138509 | ##### | ##### |
| PRRG3    | -2.97114 | 0.89104  | ##### | ##### |
| HAS3     | -2.91342 | 3.4225   | ##### | ##### |
| PRG4     | -3.55883 | 3.672924 | ##### | ##### |
| STAB2    | -2.90982 | 0.394313 | ##### | ##### |
| EDNRB    | -2.1725  | 3.897392 | ##### | ##### |
| FAM89A   | -2.50793 | 3.250441 | ##### | ##### |
| FAM162B  | -2.15164 | -0.11394 | ##### | ##### |
| TCEAL7   | -2.15515 | 1.260868 | ##### | ##### |
| RNF150   | -2.64161 | 4.266137 | ##### | ##### |
| TMEM255  | -2.24852 | 1.908699 | ##### | ##### |
| EGR1     | -2.68265 | 8.578401 | ##### | ##### |
| CDC25C   | 3.375912 | 2.589479 | ##### | ##### |
| NRN1     | -2.25603 | 4.190616 | ##### | ##### |
| GPRASP1  | -2.03951 | 3.183797 | ##### | ##### |
| ALAS2    | -3.27325 | -2.35778 | ##### | ##### |
| SLC29A4  | -2.53771 | 3.502501 | ##### | ##### |
| IQGAP3   | 3.691798 | 5.292485 | ##### | ##### |
| SLC22A12 | -4.84936 | -2.97145 | ##### | ##### |
| DEPP1    | -2.24439 | 6.714769 | ##### | ##### |
| FOSB     | -3.41546 | 6.927168 | ##### | ##### |
| KIT      | -2.97063 | 5.9787   | ##### | ##### |
| FGF1     | -2.08643 | 4.217781 | ##### | ##### |
| HBA1     | -4.06144 | -2.3699  | ##### | ##### |
| TMEM100  | -3.26774 | 2.252493 | ##### | ##### |
| MEOX2    | -2.74516 | 2.855392 | ##### | ##### |
| APOLD1   | -2.07059 | 5.490704 | ##### | ##### |
| TSHZ2    | -2.39415 | 4.615388 | ##### | ##### |
| UBE2T    | 3.209592 | 4.538172 | ##### | ##### |
| UHRF1    | 3.339873 | 4.436335 | ##### | ##### |
| NUSAP1   | 3.043835 | 5.484831 | ##### | ##### |
| TMEM252  | -3.17608 | -2.3615  | ##### | ##### |
| VGLL2    | -5.57617 | -2.33476 | ##### | ##### |
| TPX2     | 3.559769 | 6.280784 | ##### | ##### |
| ADAM33   | -2.71064 | 2.924345 | ##### | ##### |
| CHL1     | -2.96504 | 3.891112 | ##### | ##### |

|          |          |          |       |       |
|----------|----------|----------|-------|-------|
| WASF3    | -2.18018 | 3.835837 | ##### | ##### |
| APCDD1   | -2.16822 | 4.886546 | ##### | ##### |
| DMRT2    | -2.82392 | 0.364092 | ##### | ##### |
| FFAR4    | -2.04483 | 0.986278 | ##### | ##### |
| ADCYAP1  | -2.66195 | 1.863035 | ##### | ##### |
| B3GALT1  | -3.14589 | -0.452   | ##### | ##### |
| PDE1C    | -2.77921 | 2.740609 | ##### | ##### |
| TNMD     | -3.95328 | 1.263694 | ##### | ##### |
| INMT     | -2.5214  | 2.587207 | ##### | ##### |
| CAMK2A   | -2.86561 | 0.076094 | ##### | ##### |
| CMYA5    | -2.63589 | 5.737895 | ##### | ##### |
| ADGRD1   | -2.55873 | 2.357217 | ##### | ##### |
| SEL1L2   | -3.62294 | -2.46248 | ##### | ##### |
| SMCO1    | -4.9112  | -1.51207 | ##### | ##### |
| NDRG2    | -2.20614 | 6.917361 | ##### | ##### |
| HJURP    | 3.513278 | 3.930626 | ##### | ##### |
| PGM5     | -2.53462 | 3.488326 | ##### | ##### |
| CFD      | -3.08652 | 5.822135 | ##### | ##### |
| NUF2     | 3.759874 | 4.128511 | ##### | ##### |
| MATN2    | -2.54313 | 5.665412 | ##### | ##### |
| TMOD1    | -2.78179 | 1.947726 | ##### | ##### |
| PER1     | -2.06514 | 5.708628 | ##### | ##### |
| CD209    | -2.64087 | 2.59281  | ##### | ##### |
| CDK1     | 3.140693 | 5.514016 | ##### | ##### |
| CLDN5    | -2.57763 | 4.02517  | ##### | ##### |
| TRPM3    | -2.72883 | -1.31831 | ##### | ##### |
| APOB     | -4.32887 | 1.290748 | ##### | ##### |
| ESR2     | -2.06761 | -0.21211 | ##### | ##### |
| SFTPB    | -4.50679 | 1.189287 | ##### | ##### |
| HOXA4    | -2.30205 | 0.296278 | ##### | ##### |
| CCNB1    | 2.558088 | 5.680937 | ##### | ##### |
| SLC22A3  | -2.85733 | 1.62272  | ##### | ##### |
| DTL      | 3.040552 | 4.916739 | ##### | ##### |
| PAFAH1B: | 2.476745 | 5.948891 | ##### | ##### |
| UBE2C    | 4.171811 | 5.290706 | ##### | ##### |
| RYR1     | -3.03111 | 3.863924 | ##### | ##### |
| NT5C1A   | -3.99189 | -3.39819 | ##### | ##### |
| TWIST2   | -2.29938 | 2.512392 | ##### | ##### |
| CKAP2L   | 3.325133 | 3.604713 | ##### | ##### |
| RXRG     | -3.01274 | -0.57279 | ##### | ##### |
| PLPP4    | 4.987951 | 3.006473 | ##### | ##### |
| CPM      | -2.0778  | 5.394567 | ##### | ##### |
| KCNMB1   | -2.42696 | 3.43322  | ##### | ##### |
| TROAP    | 3.556464 | 3.847732 | ##### | ##### |
| CKS2     | 2.640677 | 5.045703 | ##### | ##### |
| MEDAG    | -2.39256 | 3.606128 | ##### | ##### |
| LRR38    | -3.66472 | -2.85788 | ##### | ##### |
| POC1A    | 2.10095  | 3.658934 | ##### | ##### |
| AOC2     | -2.28243 | 0.563157 | ##### | ##### |
| NR3C2    | -2.15776 | 3.367776 | ##### | ##### |
| MYH1     | -4.00021 | 1.46723  | ##### | ##### |
| LRR370   | -2.04838 | -0.28016 | ##### | ##### |
| ZWINT    | 2.574227 | 5.385282 | ##### | ##### |
| SLC25A34 | -2.02516 | 0.342656 | ##### | ##### |
| DUPD1    | -4.47845 | -3.4515  | ##### | ##### |
| ANGPTL7  | -4.13027 | 0.513818 | ##### | ##### |
| HMMR     | 3.032172 | 3.918326 | ##### | ##### |
| ZFP36    | -2.21469 | 7.714901 | ##### | ##### |

|          |          |          |       |       |
|----------|----------|----------|-------|-------|
| PLK1     | 3.408003 | 4.9238   | ##### | ##### |
| BUB1     | 3.283432 | 4.747064 | ##### | ##### |
| KIF20A   | 3.367062 | 4.881011 | ##### | ##### |
| CENPF    | 3.256319 | 6.835029 | ##### | ##### |
| SPC24    | 3.137741 | 3.50143  | ##### | ##### |
| CEP55    | 3.417098 | 4.559112 | ##### | ##### |
| ADH4     | -3.72199 | -1.66629 | ##### | ##### |
| DNASE1L3 | -2.76015 | 1.004835 | ##### | ##### |
| IGF1     | -2.50572 | 2.095192 | ##### | ##### |
| CDKN3    | 2.89437  | 3.348373 | ##### | ##### |
| TEDC2    | 2.826684 | 2.925934 | ##### | ##### |
| RSPO3    | -2.45191 | 2.527058 | ##### | ##### |
| P2RY12   | -2.54091 | 0.973712 | ##### | ##### |
| CCDC141  | -2.58012 | -0.23101 | ##### | ##### |
| KIFC1    | 3.145346 | 5.13584  | ##### | ##### |
| ADAMTS1  | -2.24111 | 6.213319 | ##### | ##### |
| PBK      | 3.445974 | 3.852991 | ##### | ##### |
| XPNPEP2  | -2.83301 | 0.936632 | ##### | ##### |
| C8orf88  | -2.09064 | -0.14371 | ##### | ##### |
| FGF2     | -2.73765 | 4.047533 | ##### | ##### |
| INHBA    | 3.404352 | 6.286295 | ##### | ##### |
| ITM2A    | -2.25128 | 4.91082  | ##### | ##### |
| GLP2R    | -3.45086 | -0.6157  | ##### | ##### |
| PI16     | -3.694   | 4.297964 | ##### | ##### |
| ERICH4   | -2.71143 | -3.55081 | ##### | ##### |
| COL11A1  | 6.179655 | 7.718607 | ##### | ##### |
| RPL3L    | -3.69957 | 0.856876 | ##### | ##### |
| CCDC36   | -2.01223 | -0.09392 | ##### | ##### |
| SLC36A2  | -4.07046 | -2.27843 | ##### | ##### |
| BUB1B    | 2.946698 | 4.328321 | ##### | ##### |
| DLGAP5   | 3.290165 | 4.153816 | ##### | ##### |
| PTTG1    | 3.197336 | 4.572415 | ##### | ##### |
| NEIL3    | 3.384476 | 1.819944 | ##### | ##### |
| MYADML2  | -2.80516 | -1.70955 | ##### | ##### |
| PYCR1    | 2.354376 | 6.683581 | ##### | ##### |
| AURKA    | 3.104751 | 4.676462 | ##### | ##### |
| IGSF10   | -2.88842 | 3.294807 | ##### | ##### |
| SCN9A    | -2.29327 | 0.640857 | ##### | ##### |
| ISM1     | -2.19719 | 3.893774 | ##### | ##### |
| BICDL1   | 2.730306 | 4.605394 | ##### | ##### |
| SYN2     | -2.78437 | 2.100549 | ##### | ##### |
| ADH1C    | -3.44909 | 1.707286 | ##### | ##### |
| SMPX     | -5.32249 | -0.37907 | ##### | ##### |
| MELK     | 3.620989 | 4.373061 | ##### | ##### |
| KIF18B   | 3.555642 | 3.595065 | ##### | ##### |
| KLHL13   | -2.61788 | 3.666951 | ##### | ##### |
| WISP1    | 3.532437 | 4.329334 | ##### | ##### |
| AKAP6    | -2.17392 | 2.41082  | ##### | ##### |
| CAPN11   | -2.35772 | 1.052535 | ##### | ##### |
| CREB5    | -2.06831 | 3.220545 | ##### | ##### |
| C10orf71 | -7.32146 | 0.624093 | ##### | ##### |
| CLDN11   | -2.43478 | 3.592851 | ##### | ##### |
| PAK3     | -2.56675 | 2.100545 | ##### | ##### |
| RHOXF1   | -2.57058 | -2.12796 | ##### | ##### |
| LMNB1    | 2.442525 | 5.946681 | ##### | ##### |
| RBP7     | -2.22498 | 3.960167 | ##### | ##### |
| RRM2     | 3.398477 | 5.774084 | ##### | ##### |
| KIF11    | 2.504218 | 5.296181 | ##### | ##### |

|           |          |          |          |          |
|-----------|----------|----------|----------|----------|
| CSRNP3    | -2.36065 | 2.171807 | #####    | #####    |
| HCAR3     | -2.21517 | -1.00485 | #####    | #####    |
| XIRP2     | -7.1469  | 3.654136 | #####    | #####    |
| LRR3B     | -3.53017 | -1.57655 | #####    | #####    |
| KIF2C     | 3.312096 | 4.795653 | #####    | #####    |
| NUAK2     | 2.244826 | 3.505458 | #####    | #####    |
| HSPB2-C1  | -2.96398 | -4.19141 | #####    | #####    |
| KIF23     | 2.622627 | 4.806536 | #####    | #####    |
| EXO1      | 3.427688 | 3.843845 | #####    | #####    |
| PAQR4     | 2.571342 | 5.099606 | #####    | #####    |
| CDCA8     | 3.013989 | 4.524333 | #####    | #####    |
| SGO1      | 3.251389 | 2.639687 | #####    | #####    |
| ERCC6L    | 2.837807 | 2.812064 | #####    | #####    |
| MFAP4     | -2.48743 | 6.329252 | #####    | #####    |
| RYR3      | -2.30613 | 1.580358 | #####    | #####    |
| PDE11A    | -2.47001 | 1.805857 | #####    | #####    |
| CSRP3     | -7.10541 | 1.756864 | #####    | #####    |
| GABRD     | 3.214489 | 1.928326 | #####    | #####    |
| PLN       | -2.39982 | 2.663352 | #####    | 1.09E-99 |
| ASPM      | 3.520953 | 5.019892 | #####    | 3.11E-99 |
| HOXA5     | -2.37852 | 2.21911  | #####    | 3.25E-99 |
| NDC80     | 3.188414 | 4.001114 | #####    | 6.94E-99 |
| TK1       | 3.071576 | 6.075287 | #####    | 6.97E-99 |
| KNL1      | 2.819056 | 3.877682 | #####    | 7.24E-99 |
| SKA3      | 3.067062 | 3.36388  | #####    | 1.22E-98 |
| NCAPG     | 3.052246 | 4.246898 | #####    | 2.21E-98 |
| ODF3L1    | -2.2881  | -1.15275 | 1.27E-99 | 3.32E-98 |
| SCN3A     | -2.83505 | 0.757548 | 1.33E-99 | 3.48E-98 |
| SKA1      | 3.35786  | 3.049701 | 1.44E-99 | 3.74E-98 |
| USP44     | -2.27505 | -0.47251 | 1.59E-99 | 4.13E-98 |
| TACC3     | 2.328471 | 5.566559 | 1.65E-99 | 4.30E-98 |
| TGFBR3    | -2.46509 | 6.269243 | 2.25E-99 | 5.83E-98 |
| IL33      | -2.71843 | 4.266532 | 2.32E-99 | 6.01E-98 |
| C4orf54   | -4.76967 | -0.31197 | 3.14E-99 | 8.12E-98 |
| CDCA5     | 3.083353 | 4.827761 | 7.47E-99 | 1.93E-97 |
| GPRIN1    | 2.873805 | 3.347906 | 8.11E-99 | 2.09E-97 |
| CCNB2     | 3.031711 | 4.617282 | 9.81E-99 | 2.52E-97 |
| RAD51     | 2.571449 | 3.304819 | 1.23E-98 | 3.16E-97 |
| PRC1      | 2.638317 | 5.79364  | 1.99E-98 | 5.09E-97 |
| FOS       | -2.57267 | 8.515306 | 2.49E-98 | 6.34E-97 |
| VIT       | -2.81695 | 2.604766 | 3.87E-98 | 9.83E-97 |
| CX3CL1    | -2.38728 | 6.636777 | 5.44E-98 | 1.38E-96 |
| EGR2      | -2.20073 | 4.8762   | 5.60E-98 | 1.42E-96 |
| GTSE1     | 3.029573 | 3.661537 | 8.89E-98 | 2.24E-96 |
| GINS1     | 2.483111 | 4.275875 | 1.09E-97 | 2.75E-96 |
| AKR1C3    | -2.37848 | 4.683719 | 1.20E-97 | 3.02E-96 |
| ANLN      | 3.362115 | 5.51048  | 1.41E-97 | 3.53E-96 |
| NMRK2     | -4.93836 | -1.98748 | 1.43E-97 | 3.58E-96 |
| GLRA4     | -3.26573 | -2.32205 | 1.54E-97 | 3.84E-96 |
| EZH2      | 2.298157 | 4.717518 | 1.67E-97 | 4.16E-96 |
| CNTNAP3   | -2.74607 | 0.056313 | 2.01E-97 | 5.01E-96 |
| KLHL30    | -2.75907 | 0.164976 | 2.05E-97 | 5.11E-96 |
| SAA2-SAA1 | -3.70214 | 2.131296 | 3.87E-97 | 9.62E-96 |
| MEOX1     | -2.69623 | 3.035626 | 6.80E-97 | 1.69E-95 |
| SAA1      | -3.34532 | 6.649437 | 7.88E-97 | 1.95E-95 |
| CDCA3     | 3.043513 | 3.965058 | 8.37E-97 | 2.07E-95 |
| SPAG5     | 2.79338  | 5.177933 | 9.55E-97 | 2.36E-95 |
| RMI2      | 2.649482 | 4.080859 | 2.19E-96 | 5.40E-95 |

|          |          |          |          |          |
|----------|----------|----------|----------|----------|
| OIP5     | 2.428254 | 1.691828 | 5.40E-96 | 1.32E-94 |
| FNDC5    | -2.28125 | 1.498095 | 1.14E-95 | 2.79E-94 |
| MRGPRF   | -2.02262 | 2.844788 | 4.38E-95 | 1.06E-93 |
| SLCO1C1  | -2.03939 | -0.97466 | 4.40E-95 | 1.06E-93 |
| FAM110D  | -2.07731 | 1.508107 | 6.68E-95 | 1.61E-93 |
| ITLN1    | -3.97663 | -2.35897 | 1.84E-94 | 4.40E-93 |
| NCAPH    | 2.7728   | 3.993313 | 2.50E-94 | 5.97E-93 |
| TMC2     | -2.38375 | -1.46223 | 2.79E-94 | 6.66E-93 |
| FOX M1   | 3.453551 | 5.518106 | 6.54E-94 | 1.55E-92 |
| HPSE2    | -3.21444 | 0.953077 | 1.75E-93 | 4.14E-92 |
| DEPDC1B  | 2.930067 | 2.669243 | 1.82E-93 | 4.28E-92 |
| KIF14    | 3.498638 | 3.631546 | 1.88E-93 | 4.44E-92 |
| URAD     | -4.03683 | -3.5933  | 4.10E-93 | 9.62E-92 |
| UTS2B    | -2.24368 | -1.91214 | 5.11E-93 | 1.20E-91 |
| ABCB1    | -2.03609 | 2.631184 | 5.96E-93 | 1.40E-91 |
| CENPM    | 2.802452 | 3.154748 | 8.06E-93 | 1.88E-91 |
| SCN2B    | -2.83979 | 0.733626 | 1.94E-92 | 4.49E-91 |
| FAM83D   | 3.491509 | 4.243857 | 3.19E-92 | 7.39E-91 |
| ASB15    | -4.15926 | -1.49831 | 3.89E-92 | 8.97E-91 |
| CDC20    | 3.523461 | 5.310317 | 4.35E-92 | 1.00E-90 |
| ESPL1    | 2.726274 | 4.223674 | 5.25E-92 | 1.21E-90 |
| ASB12    | -2.68005 | -2.02167 | 1.04E-91 | 2.39E-90 |
| BIRC5    | 3.554034 | 5.570629 | 1.19E-91 | 2.72E-90 |
| CENPU    | 2.364185 | 4.651917 | 2.97E-91 | 6.78E-90 |
| MKI67    | 3.076669 | 6.680009 | 3.39E-91 | 7.73E-90 |
| TOP2A    | 3.495625 | 7.349696 | 8.28E-91 | 1.88E-89 |
| RECQL4   | 2.785872 | 4.879917 | 8.69E-91 | 1.97E-89 |
| CCNA2    | 2.852227 | 4.602769 | 1.41E-90 | 3.18E-89 |
| MMP28    | -2.015   | 2.515599 | 2.23E-90 | 5.01E-89 |
| AC007906 | -2.78424 | 1.662245 | 2.75E-90 | 6.17E-89 |
| SCN11A   | -2.12119 | -0.3787  | 9.23E-90 | 2.06E-88 |
| SLC24A2  | 4.943073 | 2.521134 | 1.46E-89 | 3.25E-88 |
| CMA1     | -2.93588 | 0.07038  | 1.46E-89 | 3.25E-88 |
| CLDN19   | -3.48717 | 0.601487 | 1.58E-89 | 3.51E-88 |
| ASB10    | -5.86901 | -3.2364  | 4.32E-89 | 9.57E-88 |
| NWD2     | -3.64626 | -0.65084 | 1.51E-88 | 3.32E-87 |
| HAGHL    | 3.455151 | 3.649958 | 1.56E-88 | 3.42E-87 |
| KCNA2    | -2.89348 | -1.64255 | 1.63E-88 | 3.55E-87 |
| ESCO2    | 2.70108  | 2.922141 | 2.33E-88 | 5.08E-87 |
| AURKB    | 3.376391 | 3.760906 | 3.13E-88 | 6.82E-87 |
| PPP1R3A  | -7.87714 | -0.31291 | 4.35E-88 | 9.46E-87 |
| DUSP26   | -3.3218  | -0.28759 | 8.22E-88 | 1.79E-86 |
| TRIM54   | -3.48871 | -0.47492 | 2.11E-87 | 4.58E-86 |
| DUSP1    | -2.01015 | 7.67873  | 6.22E-87 | 1.34E-85 |
| C1QTNF6  | 2.208098 | 5.525203 | 7.34E-87 | 1.58E-85 |
| RASSF9   | -2.04873 | 2.124163 | 8.90E-87 | 1.91E-85 |
| DUSP27   | -2.89106 | -0.17926 | 1.37E-86 | 2.93E-85 |
| CRYAB    | -2.84763 | 6.995986 | 1.01E-85 | 2.16E-84 |
| DSC1     | -2.6231  | -0.28738 | 1.21E-85 | 2.57E-84 |
| CENPA    | 3.257604 | 2.923558 | 1.62E-85 | 3.44E-84 |
| TMEM178  | -2.12212 | 1.434934 | 1.68E-85 | 3.56E-84 |
| MTFR2    | 2.817249 | 2.016052 | 1.93E-85 | 4.06E-84 |
| DEPDC1   | 3.242792 | 3.774037 | 2.44E-85 | 5.13E-84 |
| OVCH2    | -3.21537 | -0.75923 | 3.04E-85 | 6.37E-84 |
| TACR1    | -2.61926 | 2.292803 | 4.84E-85 | 1.01E-83 |
| ANKRD29  | -2.2067  | 2.837214 | 5.53E-85 | 1.16E-83 |
| KCNE1    | -2.47384 | -1.30069 | 8.14E-85 | 1.70E-83 |
| ESM1     | 2.949913 | 3.416287 | 8.71E-85 | 1.81E-83 |

|          |          |          |          |          |
|----------|----------|----------|----------|----------|
| PPP1R14A | -2.32961 | 2.410693 | 1.32E-84 | 2.73E-83 |
| TECRL    | -7.14102 | -2.5245  | 1.57E-84 | 3.26E-83 |
| GJB2     | 4.280982 | 5.440854 | 2.47E-84 | 5.09E-83 |
| SERTM1   | -3.67069 | -2.44906 | 2.69E-84 | 5.55E-83 |
| ZBTB16   | -3.03463 | 2.700773 | 3.51E-84 | 7.22E-83 |
| SHCBP1   | 2.592394 | 3.600851 | 3.96E-84 | 8.15E-83 |
| CENPE    | 2.600495 | 4.340034 | 4.63E-84 | 9.52E-83 |
| KCNB1    | -2.87798 | 2.75099  | 4.97E-84 | 1.02E-82 |
| CDC45    | 2.888957 | 3.438525 | 1.21E-83 | 2.47E-82 |
| CILP2    | 3.450503 | 4.049768 | 1.24E-83 | 2.53E-82 |
| ACADL    | -3.356   | 1.185618 | 1.46E-83 | 2.97E-82 |
| PTGIS    | -2.02458 | 5.077114 | 1.64E-83 | 3.32E-82 |
| SOD3     | -2.33556 | 4.726002 | 2.27E-83 | 4.60E-82 |
| GPR182   | -2.31134 | -1.71303 | 2.47E-83 | 5.00E-82 |
| RAD54L   | 2.777522 | 2.886863 | 2.61E-83 | 5.26E-82 |
| GRIA4    | -3.32064 | 1.399472 | 5.54E-83 | 1.11E-81 |
| ADAMTS1  | 3.095779 | 2.787586 | 6.26E-83 | 1.26E-81 |
| E2F1     | 2.63488  | 4.519286 | 7.09E-83 | 1.42E-81 |
| COL25A1  | -2.52269 | 0.424892 | 7.29E-83 | 1.46E-81 |
| COMP     | 4.486943 | 7.058344 | 1.01E-82 | 2.01E-81 |
| IQANK1   | 2.221527 | 5.819354 | 1.16E-82 | 2.32E-81 |
| UBE2S    | 2.509733 | 4.537988 | 1.25E-82 | 2.50E-81 |
| KIF15    | 2.53135  | 3.619966 | 1.63E-82 | 3.26E-81 |
| CCL11    | 4.152691 | 0.51049  | 2.33E-82 | 4.63E-81 |
| WDR86    | -2.05254 | 2.068581 | 2.73E-82 | 5.42E-81 |
| FAM107A  | -2.66061 | 3.9737   | 2.78E-82 | 5.51E-81 |
| GDF10    | -3.09211 | 1.670288 | 4.71E-82 | 9.33E-81 |
| RDM1     | 3.0382   | 0.060219 | 1.05E-81 | 2.08E-80 |
| MYOM2    | -3.25762 | 3.104315 | 5.43E-81 | 1.06E-79 |
| POLQ     | 2.602348 | 3.090507 | 5.73E-81 | 1.12E-79 |
| PIMREG   | 3.035665 | 2.902828 | 1.29E-80 | 2.51E-79 |
| JPH2     | -2.38524 | 3.044412 | 1.55E-80 | 3.00E-79 |
| MYBL2    | 3.820325 | 5.844415 | 1.60E-80 | 3.10E-79 |
| PAPPA2   | -2.56642 | 0.425532 | 4.58E-80 | 8.84E-79 |
| C1QTNF7  | -2.50389 | 1.929129 | 5.72E-80 | 1.10E-78 |
| FAM47E-9 | -2.18575 | -2.38569 | 1.02E-79 | 1.95E-78 |
| CYP26B1  | -2.13818 | 3.007122 | 1.30E-79 | 2.49E-78 |
| TMTC1    | -2.22362 | 5.261079 | 2.21E-79 | 4.20E-78 |
| IBSP     | 8.030407 | 2.706278 | 3.43E-79 | 6.53E-78 |
| LRRC15   | 3.815183 | 7.131104 | 4.16E-79 | 7.88E-78 |
| VIP      | -2.03036 | -2.26788 | 4.25E-79 | 8.03E-78 |
| BGN      | 2.324024 | 9.569889 | 4.25E-79 | 8.03E-78 |
| PAK5     | -3.17337 | -0.15446 | 5.63E-79 | 1.06E-77 |
| MMP13    | 6.278153 | 4.982807 | 6.09E-79 | 1.15E-77 |
| CTXN1    | 2.861937 | 4.658716 | 6.34E-79 | 1.19E-77 |
| TTK      | 2.855834 | 4.013092 | 7.24E-79 | 1.36E-77 |
| C2orf88  | -2.24217 | 2.350002 | 1.49E-78 | 2.79E-77 |
| HSD11B1  | -2.45233 | 2.29812  | 2.20E-78 | 4.11E-77 |
| CNIH2    | 3.320475 | 2.292792 | 2.84E-78 | 5.29E-77 |
| CLSPN    | 2.859832 | 3.024544 | 3.03E-78 | 5.64E-77 |
| MAD2L1   | 2.163943 | 4.63023  | 7.29E-78 | 1.35E-76 |
| TRIP13   | 2.558483 | 4.368307 | 1.31E-77 | 2.42E-76 |
| KIF26B   | 2.809378 | 5.152616 | 1.34E-77 | 2.47E-76 |
| AL096711 | -2.09843 | -2.24931 | 1.64E-77 | 3.04E-76 |
| IL6      | -2.7911  | 2.217732 | 1.69E-77 | 3.11E-76 |
| JPT1     | 2.203548 | 6.880313 | 1.72E-77 | 3.18E-76 |
| DACT2    | -3.0121  | 0.016008 | 3.65E-77 | 6.71E-76 |
| KPNA2    | 2.146676 | 7.283683 | 3.79E-77 | 6.95E-76 |

|           |          |          |          |          |
|-----------|----------|----------|----------|----------|
| CTHRC1    | 2.408023 | 6.555601 | 4.21E-77 | 7.71E-76 |
| KIF18A    | 2.416418 | 3.135342 | 6.34E-77 | 1.16E-75 |
| SMIM10L2  | -2.14644 | 2.227762 | 7.46E-77 | 1.36E-75 |
| KCNE1B    | -2.99477 | -2.43475 | 1.13E-76 | 2.05E-75 |
| AGBL1     | -5.94732 | -3.31444 | 1.32E-76 | 2.41E-75 |
| MRGPRX2   | -3.41218 | -3.49688 | 1.51E-76 | 2.75E-75 |
| IQSEC3    | -2.12245 | 1.20258  | 2.11E-76 | 3.83E-75 |
| RBFOX1    | -3.77306 | -1.72446 | 2.55E-76 | 4.62E-75 |
| PKDCC     | -2.03381 | 3.656501 | 2.82E-76 | 5.10E-75 |
| CTNNA3    | -2.42632 | -0.28245 | 2.97E-76 | 5.37E-75 |
| GSTM5     | -3.0057  | 3.5916   | 3.02E-76 | 5.46E-75 |
| HTR2A     | -2.57554 | -0.27967 | 3.16E-76 | 5.70E-75 |
| CRB2      | -2.11283 | -0.06038 | 8.10E-76 | 1.45E-74 |
| EME1      | 2.60042  | 2.428176 | 1.14E-75 | 2.03E-74 |
| SCN5A     | -2.20784 | -0.32959 | 1.56E-75 | 2.78E-74 |
| HMGB3     | 2.419857 | 6.3348   | 1.68E-75 | 3.00E-74 |
| C6        | -3.18331 | 1.917765 | 3.30E-75 | 5.86E-74 |
| ABI3BP    | -2.15536 | 5.13192  | 3.47E-75 | 6.16E-74 |
| CLEC5A    | 3.262079 | 2.763254 | 4.97E-75 | 8.80E-74 |
| MCM10     | 3.126809 | 3.808488 | 1.28E-74 | 2.26E-73 |
| PTH1R     | -2.1337  | 1.590351 | 1.90E-74 | 3.33E-73 |
| PACSIN1   | 2.69149  | 2.224803 | 1.93E-74 | 3.37E-73 |
| CLCA4     | -3.30384 | -0.31732 | 1.97E-74 | 3.45E-73 |
| FN1       | 2.855963 | 12.22499 | 2.77E-74 | 4.84E-73 |
| ARHGAP1   | 2.21617  | 4.454134 | 3.72E-74 | 6.48E-73 |
| C10orf142 | -2.24141 | -3.05396 | 5.24E-74 | 9.09E-73 |
| NTRK2     | -2.59804 | 6.705827 | 6.24E-74 | 1.08E-72 |
| SBK1      | 2.283886 | 5.364876 | 2.27E-73 | 3.92E-72 |
| PLAC1     | 4.71508  | 0.561952 | 4.19E-73 | 7.21E-72 |
| E2F7      | 2.874607 | 2.479681 | 1.67E-72 | 2.85E-71 |
| TP63      | -2.57029 | 4.499378 | 1.91E-72 | 3.25E-71 |
| FAM111B   | 2.798861 | 4.651213 | 1.91E-72 | 3.25E-71 |
| GPC3      | -2.53466 | 5.360374 | 2.73E-72 | 4.63E-71 |
| TLCD1     | 2.432073 | 3.743773 | 2.90E-72 | 4.92E-71 |
| BMP8A     | 2.406366 | 0.422002 | 4.77E-72 | 8.05E-71 |
| TONSL     | 2.10069  | 4.624756 | 8.08E-72 | 1.36E-70 |
| TPRN      | 2.007911 | 5.352743 | 2.09E-71 | 3.51E-70 |
| CENPI     | 2.197228 | 2.658292 | 3.69E-71 | 6.17E-70 |
| PHYHIP    | -2.11281 | 1.271073 | 5.66E-71 | 9.43E-70 |
| AKR1C2    | -3.08704 | 4.860126 | 6.07E-71 | 1.01E-69 |
| STIL      | 2.08875  | 4.164737 | 7.47E-71 | 1.24E-69 |
| GPR17     | -2.35614 | -0.70402 | 7.82E-71 | 1.30E-69 |
| ATF3      | -2.06751 | 5.863758 | 1.08E-70 | 1.78E-69 |
| MND1      | 2.674999 | 2.007162 | 1.12E-70 | 1.85E-69 |
| RELN      | -2.72941 | 2.575286 | 1.47E-70 | 2.43E-69 |
| SALL4     | 2.79383  | 1.049906 | 3.21E-70 | 5.29E-69 |
| PROC      | 2.547867 | -0.0871  | 3.56E-70 | 5.86E-69 |
| RAD51AP1  | 2.269071 | 3.642957 | 5.90E-70 | 9.68E-69 |
| GRIN2B    | -2.83413 | -0.25969 | 6.59E-70 | 1.08E-68 |
| CLEC4G    | -3.05861 | -1.49207 | 8.90E-70 | 1.46E-68 |
| CDCA2     | 2.918556 | 3.28251  | 9.29E-70 | 1.52E-68 |
| EPHB1     | -2.23146 | 2.645756 | 1.02E-69 | 1.67E-68 |
| COL17A1   | -2.83667 | 6.013174 | 1.19E-69 | 1.93E-68 |
| MYL1      | -7.70413 | 3.602681 | 1.45E-69 | 2.35E-68 |
| BMP2      | -2.18029 | 1.773786 | 1.74E-69 | 2.82E-68 |
| P4HA3     | 2.441094 | 3.313339 | 2.46E-69 | 3.97E-68 |
| TCEAL5    | -2.78059 | -0.59816 | 2.76E-69 | 4.45E-68 |
| P2RX6     | -2.37344 | -0.90184 | 5.00E-69 | 8.06E-68 |

|          |          |          |          |          |
|----------|----------|----------|----------|----------|
| RNFT2    | 2.109291 | 2.807031 | 1.24E-68 | 1.98E-67 |
| RAB26    | 3.116576 | 3.369933 | 1.78E-68 | 2.82E-67 |
| FAM189A: | -2.13717 | 4.073744 | 1.78E-68 | 2.83E-67 |
| SCN3B    | -2.18336 | 0.941682 | 3.50E-68 | 5.53E-67 |
| FBXO43   | 2.383047 | 0.296415 | 4.44E-68 | 6.97E-67 |
| CST1     | 6.918076 | 3.657489 | 6.92E-68 | 1.08E-66 |
| C2orf40  | -2.94062 | 2.797256 | 8.29E-68 | 1.30E-66 |
| CCDC78   | 3.52411  | 2.949242 | 1.10E-67 | 1.71E-66 |
| HOXA6    | -2.33478 | -0.45399 | 1.30E-67 | 2.02E-66 |
| SQLE     | 2.306851 | 6.710569 | 1.46E-67 | 2.25E-66 |
| PPDPFL   | -5.74148 | -1.16286 | 2.18E-67 | 3.36E-66 |
| MMP27    | -2.56648 | -1.47362 | 2.74E-67 | 4.21E-66 |
| MAPK10   | -2.03803 | 3.292753 | 2.83E-67 | 4.35E-66 |
| AOX1     | -2.26252 | 4.100703 | 3.97E-67 | 6.09E-66 |
| CSF3     | -3.68501 | -0.98584 | 4.48E-67 | 6.86E-66 |
| ADAM8    | 2.274517 | 4.52758  | 5.20E-67 | 7.95E-66 |
| HIST1H3H | 4.289524 | 3.502104 | 5.53E-67 | 8.44E-66 |
| ORC6     | 2.533531 | 2.979552 | 5.79E-67 | 8.80E-66 |
| CCNE2    | 2.412042 | 3.12412  | 5.93E-67 | 9.01E-66 |
| EPYC     | 6.011962 | 2.016068 | 7.17E-67 | 1.09E-65 |
| RHPN1    | 2.292056 | 5.57748  | 7.75E-67 | 1.17E-65 |
| AUNIP    | 2.20365  | 2.111144 | 1.02E-66 | 1.54E-65 |
| OR2B6    | 4.456616 | -0.71695 | 1.41E-66 | 2.12E-65 |
| RERGL    | -2.85768 | 1.350684 | 1.55E-66 | 2.32E-65 |
| GRM8     | 2.922678 | -0.19369 | 1.70E-66 | 2.54E-65 |
| RGS2     | -2.00892 | 5.486862 | 4.18E-66 | 6.24E-65 |
| PITX1    | 3.818643 | 5.049529 | 4.43E-66 | 6.61E-65 |
| PRELP    | -2.07077 | 6.344882 | 7.55E-66 | 1.12E-64 |
| RGS6     | -2.34294 | 0.83072  | 1.26E-65 | 1.86E-64 |
| MFAP2    | 2.331937 | 5.44676  | 1.58E-65 | 2.33E-64 |
| CDC6     | 2.98949  | 4.91579  | 1.63E-65 | 2.40E-64 |
| HIST1H2B | 2.680599 | 5.419774 | 1.77E-65 | 2.60E-64 |
| MYOCD    | -2.30532 | 0.277477 | 2.28E-65 | 3.34E-64 |
| SLC7A3   | -3.04412 | -0.03667 | 2.68E-65 | 3.92E-64 |
| GRM4     | 5.368524 | 3.123423 | 2.83E-65 | 4.13E-64 |
| HOXA2    | -2.13094 | -0.26832 | 2.83E-65 | 4.14E-64 |
| CDT1     | 2.468581 | 4.115125 | 3.08E-65 | 4.49E-64 |
| METTL11E | 5.145143 | -2.05314 | 4.19E-65 | 6.10E-64 |
| NXNL1    | -2.80848 | -3.6653  | 5.55E-65 | 8.08E-64 |
| S100B    | -2.80848 | 4.070384 | 6.60E-65 | 9.57E-64 |
| PROX1    | -2.22447 | 2.017465 | 7.31E-65 | 1.06E-63 |
| STON1-G  | -2.27525 | -2.86573 | 9.07E-65 | 1.31E-63 |
| CRYBG2   | 3.229003 | 1.677415 | 1.15E-64 | 1.65E-63 |
| MYH6     | -3.54313 | -2.3906  | 1.21E-64 | 1.74E-63 |
| HES6     | 2.861932 | 3.215656 | 1.37E-64 | 1.96E-63 |
| CCL28    | -2.41915 | 5.416242 | 1.92E-64 | 2.75E-63 |
| SCT      | 3.735369 | -0.57352 | 2.22E-64 | 3.18E-63 |
| CYP1A1   | -3.61965 | -0.35441 | 2.47E-64 | 3.54E-63 |
| TP53AIP1 | -2.28066 | 0.164807 | 3.45E-64 | 4.92E-63 |
| E2F2     | 2.570017 | 3.426552 | 3.88E-64 | 5.52E-63 |
| MMP1     | 6.485924 | 5.078756 | 5.40E-64 | 7.66E-63 |
| F12      | 2.85875  | 3.173636 | 5.45E-64 | 7.74E-63 |
| HMCN2    | -2.12977 | 2.435125 | 2.56E-63 | 3.61E-62 |
| DLGAP2   | -2.07316 | -1.69634 | 2.76E-63 | 3.89E-62 |
| TEPP     | -2.52306 | -1.59112 | 3.25E-63 | 4.57E-62 |
| GINS2    | 2.142421 | 4.390722 | 5.63E-63 | 7.88E-62 |
| TDO2     | 3.758318 | 2.287933 | 7.34E-63 | 1.03E-61 |
| NRG2     | -2.35374 | 1.26583  | 8.20E-63 | 1.15E-61 |

|          |          |          |          |          |
|----------|----------|----------|----------|----------|
| PIK3C2G  | -2.65448 | 2.731199 | 1.44E-62 | 2.00E-61 |
| KREMEN2  | 3.936391 | 1.81814  | 1.74E-62 | 2.43E-61 |
| PLCZ1    | -3.01741 | -2.54112 | 2.52E-62 | 3.50E-61 |
| FAM72A   | 2.382581 | 0.549187 | 2.68E-62 | 3.71E-61 |
| RTKN2    | 2.059666 | 3.345639 | 3.49E-62 | 4.82E-61 |
| CNKS2R2  | -2.12037 | 0.885224 | 3.55E-62 | 4.91E-61 |
| LAMP5    | 2.95292  | 3.912177 | 5.06E-62 | 6.98E-61 |
| HIST1H2A | 4.061764 | -0.43688 | 7.63E-62 | 1.05E-60 |
| TYMS     | 2.008327 | 4.781792 | 8.50E-62 | 1.16E-60 |
| TMEM270  | 4.226184 | -1.06042 | 8.85E-62 | 1.21E-60 |
| THRSP    | -2.80996 | 4.571746 | 1.62E-61 | 2.19E-60 |
| CNTNAP3  | -2.31029 | 1.022366 | 2.52E-61 | 3.41E-60 |
| DIAPH3   | 2.275066 | 3.516269 | 2.63E-61 | 3.56E-60 |
| SDS      | 2.282737 | 3.57933  | 2.92E-61 | 3.93E-60 |
| GALR1    | -2.78579 | -2.99438 | 3.73E-61 | 5.02E-60 |
| ADGRG4   | -3.09263 | -3.40686 | 7.49E-61 | 1.00E-59 |
| CHRNA6   | 4.334812 | 0.25555  | 1.02E-60 | 1.36E-59 |
| TUBB3    | 3.665015 | 1.935066 | 1.43E-60 | 1.89E-59 |
| ADRB3    | -2.84533 | -2.69253 | 1.45E-60 | 1.92E-59 |
| CNTFR    | -2.67026 | 3.205715 | 1.98E-60 | 2.61E-59 |
| FAM72D   | 2.912342 | -0.49794 | 2.04E-60 | 2.69E-59 |
| SYNGR3   | 3.164654 | 1.641495 | 2.36E-60 | 3.10E-59 |
| ORC1     | 2.271088 | 2.767496 | 3.36E-60 | 4.41E-59 |
| CEMIP    | 3.182848 | 4.451628 | 4.79E-60 | 6.28E-59 |
| NTF4     | -2.44399 | 0.114828 | 5.76E-60 | 7.54E-59 |
| SAPCD2   | 2.244881 | 4.459144 | 6.89E-60 | 8.97E-59 |
| MYPN     | -4.03343 | 0.905242 | 7.69E-60 | 1.00E-58 |
| SEMA3D   | -2.09473 | 2.747539 | 8.32E-60 | 1.08E-58 |
| TFR2     | 3.242103 | 1.903094 | 9.55E-60 | 1.24E-58 |
| HBG2     | -2.24144 | -3.02005 | 9.73E-60 | 1.26E-58 |
| AK5      | -2.37102 | 4.376774 | 1.28E-59 | 1.66E-58 |
| CFAP45   | 2.679216 | 2.607734 | 1.36E-59 | 1.76E-58 |
| BMP3     | -3.39961 | 0.352724 | 1.96E-59 | 2.51E-58 |
| ZNF695   | 3.197535 | 1.318431 | 2.32E-59 | 2.98E-58 |
| BRIP1    | 2.191326 | 3.599343 | 3.19E-59 | 4.07E-58 |
| SAA2     | -2.85429 | 4.179118 | 6.11E-59 | 7.72E-58 |
| C6orf58  | -2.03293 | -2.62285 | 6.61E-59 | 8.35E-58 |
| TMEM132  | 2.177129 | 6.708611 | 7.92E-59 | 9.94E-58 |
| EGR3     | -2.11987 | 5.345877 | 9.68E-59 | 1.21E-57 |
| OLR1     | 2.220604 | 4.366435 | 1.45E-58 | 1.81E-57 |
| LRRN3    | -2.18355 | 1.778502 | 1.74E-58 | 2.17E-57 |
| ADGRD2   | -3.59395 | 0.363928 | 1.77E-58 | 2.21E-57 |
| ENAM     | -2.34365 | -2.55119 | 2.09E-58 | 2.59E-57 |
| IRX6     | -2.46779 | 1.474897 | 2.58E-58 | 3.20E-57 |
| AJM1     | 2.032175 | 2.465382 | 3.05E-58 | 3.77E-57 |
| HIST1H2A | 4.722428 | 1.046142 | 4.54E-58 | 5.60E-57 |
| CCL16    | -2.23346 | -2.53399 | 7.33E-58 | 8.99E-57 |
| ADM2     | 2.180113 | 3.952313 | 9.10E-58 | 1.11E-56 |
| CCL23    | -2.01666 | -1.64866 | 1.47E-57 | 1.79E-56 |
| MATN3    | 2.844161 | 4.742604 | 1.72E-57 | 2.09E-56 |
| CCDC85A  | -2.03238 | 0.443688 | 2.75E-57 | 3.31E-56 |
| ARTN     | 3.205254 | 2.244982 | 3.82E-57 | 4.59E-56 |
| CST2     | 5.242925 | 1.909998 | 4.91E-57 | 5.88E-56 |
| HCN2     | 3.674663 | 0.875206 | 5.23E-57 | 6.26E-56 |
| CLCN1    | -2.17681 | -1.07241 | 6.77E-57 | 8.08E-56 |
| GLDN     | -2.12621 | 2.352293 | 1.12E-56 | 1.33E-55 |
| HIST1H2B | 4.536572 | -0.53359 | 1.16E-56 | 1.38E-55 |
| OTC      | -3.15071 | -3.67495 | 1.41E-56 | 1.67E-55 |

|          |          |          |          |          |
|----------|----------|----------|----------|----------|
| SLC8A3   | -2.04991 | -1.48425 | 1.92E-56 | 2.26E-55 |
| HASPIN   | 2.011285 | 1.55851  | 2.01E-56 | 2.36E-55 |
| RIPPLY3  | 3.161116 | 1.778086 | 2.02E-56 | 2.38E-55 |
| TCEAL6   | -2.10307 | -3.30148 | 5.58E-56 | 6.53E-55 |
| RNASE7   | -2.57943 | -0.72067 | 6.44E-56 | 7.51E-55 |
| IL4I1    | 2.674535 | 3.475962 | 1.05E-55 | 1.21E-54 |
| IL21R    | 2.626586 | 2.346503 | 1.94E-55 | 2.25E-54 |
| FOXP3    | 2.134714 | 2.594743 | 1.95E-55 | 2.26E-54 |
| TIGD3    | 2.025247 | 0.100577 | 2.27E-55 | 2.62E-54 |
| PRR11    | 2.747134 | 4.432752 | 2.69E-55 | 3.10E-54 |
| MISP     | 3.244108 | 5.395717 | 3.04E-55 | 3.50E-54 |
| MYO18B   | -2.67579 | 0.933905 | 3.15E-55 | 3.62E-54 |
| SLC16A3  | 2.250743 | 5.538085 | 3.42E-55 | 3.93E-54 |
| E2F8     | 2.649878 | 2.713391 | 4.69E-55 | 5.38E-54 |
| HIST1H2B | 2.089015 | 5.073512 | 4.80E-55 | 5.50E-54 |
| EFCAB1   | -2.36033 | 0.386476 | 7.57E-55 | 8.66E-54 |
| GFRA2    | -2.10962 | 0.817553 | 8.16E-55 | 9.33E-54 |
| SCN2A    | -2.32189 | 1.651098 | 9.48E-55 | 1.08E-53 |
| CDC25A   | 2.162167 | 3.088955 | 1.07E-54 | 1.22E-53 |
| HIST1H3J | 4.344156 | -1.80797 | 1.58E-54 | 1.79E-53 |
| BCAS4    | 2.023283 | 5.033077 | 1.72E-54 | 1.95E-53 |
| ISG15    | 3.506758 | 6.929042 | 1.83E-54 | 2.07E-53 |
| NR4A3    | -2.05082 | 3.264532 | 2.22E-54 | 2.50E-53 |
| PTN      | -2.37451 | 5.506302 | 3.11E-54 | 3.49E-53 |
| LMX1A    | -2.44185 | -1.4243  | 3.22E-54 | 3.61E-53 |
| HTR1D    | 3.598399 | 0.332454 | 3.50E-54 | 3.92E-53 |
| GFAP     | -2.43547 | 0.743297 | 4.21E-54 | 4.71E-53 |
| OGN      | -2.37098 | 5.178436 | 6.32E-54 | 7.05E-53 |
| CXCL11   | 3.720499 | 3.855652 | 6.94E-54 | 7.74E-53 |
| PRR36    | 2.208552 | 5.228425 | 8.17E-54 | 9.07E-53 |
| GADL1    | -3.09749 | -1.76912 | 1.07E-53 | 1.19E-52 |
| KIFC2    | 2.094029 | 4.548978 | 1.15E-53 | 1.28E-52 |
| DPP6     | -2.70592 | -0.13175 | 1.33E-53 | 1.48E-52 |
| HIST1H4I | 2.016799 | 4.009688 | 1.45E-53 | 1.60E-52 |
| ITPKA    | 3.334505 | 0.57543  | 3.19E-53 | 3.50E-52 |
| ELANE    | -2.40938 | -2.42191 | 3.60E-53 | 3.94E-52 |
| SLC7A14  | -2.59476 | -2.66826 | 3.81E-53 | 4.17E-52 |
| GPRC5A   | 2.364644 | 8.42233  | 8.08E-53 | 8.78E-52 |
| GABRE    | -2.36874 | 3.873181 | 1.27E-52 | 1.37E-51 |
| GNG13    | 5.49605  | 0.116934 | 1.41E-52 | 1.52E-51 |
| PNMA8C   | -2.78047 | -2.71544 | 1.50E-52 | 1.63E-51 |
| C3orf67  | 2.087615 | 2.276248 | 1.72E-52 | 1.86E-51 |
| HIST1H3D | 3.444997 | 1.216413 | 2.18E-52 | 2.35E-51 |
| CXCL10   | 3.581061 | 5.753133 | 2.19E-52 | 2.36E-51 |
| ACKR1    | -2.34862 | 5.066599 | 2.85E-52 | 3.06E-51 |
| FFAR3    | -2.19258 | -3.34333 | 2.90E-52 | 3.11E-51 |
| HIST1H2B | 3.675208 | -1.26232 | 3.18E-52 | 3.41E-51 |
| S100P    | 4.760581 | 5.804742 | 8.42E-52 | 8.96E-51 |
| COX6C    | 2.785068 | 9.212201 | 8.92E-52 | 9.47E-51 |
| AGMO     | -2.12031 | -0.3836  | 9.99E-52 | 1.06E-50 |
| RGS7BP   | -2.12649 | -0.50984 | 1.99E-51 | 2.10E-50 |
| C9orf116 | 2.030017 | 3.195893 | 2.14E-51 | 2.26E-50 |
| TESMIN   | 2.003942 | 5.215568 | 2.54E-51 | 2.67E-50 |
| CD80     | 2.220237 | 0.463717 | 5.13E-51 | 5.36E-50 |
| NSG1     | -2.20053 | 1.945496 | 5.85E-51 | 6.10E-50 |
| CST4     | 8.301875 | 2.425084 | 6.31E-51 | 6.57E-50 |
| SYNDIG1  | 2.825771 | 2.924779 | 6.37E-51 | 6.62E-50 |
| TNFRSF18 | 2.909495 | 3.223747 | 8.49E-51 | 8.80E-50 |

|           |          |          |          |          |
|-----------|----------|----------|----------|----------|
| ASB4      | -2.43924 | -1.32901 | 1.13E-50 | 1.17E-49 |
| FAM72B    | 2.316201 | 0.359765 | 1.42E-50 | 1.46E-49 |
| PIF1      | 2.330504 | 1.717216 | 2.71E-50 | 2.77E-49 |
| LCN6      | -2.30709 | -1.6826  | 4.53E-50 | 4.61E-49 |
| EPN3      | 2.189618 | 5.57956  | 5.66E-50 | 5.74E-49 |
| ALX4      | -2.3498  | 2.0591   | 6.93E-50 | 7.01E-49 |
| CAMK2N2   | 3.097687 | 0.028534 | 7.03E-50 | 7.11E-49 |
| HIST1H2B  | 3.471178 | 0.941498 | 7.65E-50 | 7.73E-49 |
| PENK      | -3.00806 | 1.35941  | 1.02E-49 | 1.02E-48 |
| DQX1      | 3.882945 | 1.221049 | 1.04E-49 | 1.04E-48 |
| MAPK8IP2  | 2.726613 | 5.070892 | 2.06E-49 | 2.06E-48 |
| SFRP1     | -2.56436 | 8.035425 | 2.76E-49 | 2.76E-48 |
| DBX2      | -2.03941 | -1.45646 | 4.43E-49 | 4.40E-48 |
| RNF186    | -3.05918 | -1.41133 | 4.95E-49 | 4.91E-48 |
| KIAA1211  | 2.66759  | 2.740753 | 6.39E-49 | 6.33E-48 |
| HAPLN1    | 5.292769 | 2.599258 | 8.77E-49 | 8.65E-48 |
| FGFBP2    | -2.74702 | 1.467119 | 1.14E-48 | 1.11E-47 |
| NRG1      | -2.14325 | 2.990359 | 1.33E-48 | 1.30E-47 |
| TNFRSF9   | 2.681617 | 1.767034 | 1.53E-48 | 1.50E-47 |
| CREB3L1   | 2.296485 | 6.264086 | 2.51E-48 | 2.45E-47 |
| ILDR2     | 2.267273 | 0.91599  | 3.43E-48 | 3.33E-47 |
| CYSRT1    | 2.274769 | 1.263748 | 3.72E-48 | 3.61E-47 |
| HIST2H4A  | 2.856667 | -0.72794 | 3.74E-48 | 3.62E-47 |
| TICRR     | 2.055067 | 3.31536  | 5.77E-48 | 5.58E-47 |
| HIST1H2A  | 3.571102 | 0.800636 | 8.92E-48 | 8.61E-47 |
| RHBDL1    | 2.611464 | 2.189306 | 1.10E-47 | 1.06E-46 |
| PTGFR     | -2.12185 | 2.049205 | 1.38E-47 | 1.32E-46 |
| CPA2      | -2.40052 | -2.49852 | 1.41E-47 | 1.35E-46 |
| COL1A1    | 2.249849 | 12.74949 | 1.94E-47 | 1.86E-46 |
| EGFL6     | -2.00925 | 2.909357 | 1.95E-47 | 1.86E-46 |
| HSH2D     | 2.670175 | 4.385635 | 2.07E-47 | 1.98E-46 |
| CADM3     | -2.24478 | 2.337414 | 2.20E-47 | 2.10E-46 |
| METRNL    | 2.371857 | 5.798366 | 2.49E-47 | 2.37E-46 |
| C20orf204 | 2.379517 | 1.287088 | 2.66E-47 | 2.52E-46 |
| LEF1      | 2.023768 | 4.764676 | 4.64E-47 | 4.36E-46 |
| TMEM145   | 3.791767 | 2.147205 | 5.53E-47 | 5.18E-46 |
| GBX2      | 4.301492 | -2.12705 | 6.17E-47 | 5.77E-46 |
| 4-Mar     | 4.748975 | 0.144629 | 7.03E-47 | 6.56E-46 |
| CELSR3    | 2.483051 | 3.983326 | 1.06E-46 | 9.80E-46 |
| TEX26     | -2.79361 | -3.53541 | 1.15E-46 | 1.06E-45 |
| DNASE1L2  | 2.293312 | 0.644552 | 1.71E-46 | 1.58E-45 |
| PTK6      | 2.020377 | 4.440134 | 1.82E-46 | 1.68E-45 |
| S100A14   | 2.661026 | 7.748471 | 2.66E-46 | 2.44E-45 |
| ART1      | -2.88812 | -2.69834 | 3.18E-46 | 2.91E-45 |
| LHX2      | 4.330724 | -0.18482 | 3.66E-46 | 3.34E-45 |
| GPR19     | 2.314404 | 0.829281 | 4.55E-46 | 4.15E-45 |
| SYNGR4    | 3.099462 | -1.51716 | 7.71E-46 | 6.99E-45 |
| INMT-MIN  | -2.38451 | -4.28877 | 1.09E-45 | 9.88E-45 |
| NKX3-2    | 2.915895 | 0.253714 | 1.26E-45 | 1.14E-44 |
| SMIM22    | 2.515753 | 5.693919 | 1.46E-45 | 1.32E-44 |
| POSTN     | 2.133681 | 10.19652 | 1.47E-45 | 1.33E-44 |
| CLPSL2    | 3.348217 | 0.615996 | 1.65E-45 | 1.49E-44 |
| HIST3H2B  | 3.144779 | 1.519766 | 2.26E-45 | 2.03E-44 |
| CCR8      | 3.18058  | -0.33247 | 2.65E-45 | 2.37E-44 |
| SRMS      | 2.358953 | 2.490359 | 2.91E-45 | 2.60E-44 |
| ADGRL3    | -2.04566 | 2.090037 | 2.96E-45 | 2.64E-44 |
| FAT2      | -2.20336 | 4.103707 | 4.51E-45 | 4.01E-44 |
| RPE65     | -2.62699 | -2.69402 | 7.76E-45 | 6.85E-44 |

|          |          |          |          |          |
|----------|----------|----------|----------|----------|
| CHST9    | -2.36662 | 2.125477 | 1.08E-44 | 9.48E-44 |
| IFI6     | 2.868625 | 8.54821  | 1.23E-44 | 1.08E-43 |
| HOXC13   | 2.964114 | 3.519283 | 1.58E-44 | 1.39E-43 |
| NKAIN1   | 4.010685 | 5.543645 | 1.87E-44 | 1.64E-43 |
| CAMP     | 4.331405 | 0.838362 | 3.44E-44 | 2.98E-43 |
| CAPZA3   | -2.77943 | -2.88038 | 3.47E-44 | 3.01E-43 |
| NPR3     | -2.01592 | 4.486411 | 3.48E-44 | 3.01E-43 |
| CCNE1    | 2.780242 | 3.133514 | 3.81E-44 | 3.30E-43 |
| DCT      | -2.54688 | -0.37889 | 4.10E-44 | 3.54E-43 |
| DPEP1    | 2.440827 | 0.662727 | 4.83E-44 | 4.16E-43 |
| CCL21    | -2.34711 | 4.164925 | 4.94E-44 | 4.26E-43 |
| CNTD2    | 3.025296 | 3.020321 | 5.28E-44 | 4.55E-43 |
| SLC16A12 | -2.18834 | 0.100394 | 5.56E-44 | 4.79E-43 |
| MYOC     | -3.79361 | 2.397808 | 5.84E-44 | 5.02E-43 |
| MYBPH    | -2.20487 | -1.00822 | 6.42E-44 | 5.52E-43 |
| JAKMIP1  | 2.764197 | 0.949733 | 7.90E-44 | 6.78E-43 |
| C2CD4B   | -2.10071 | 1.201644 | 1.20E-43 | 1.02E-42 |
| ANKRD22  | 2.112549 | 2.848279 | 1.41E-43 | 1.20E-42 |
| FBN2     | 3.053289 | 3.699653 | 1.62E-43 | 1.38E-42 |
| STARD10  | 2.141487 | 7.924996 | 1.86E-43 | 1.58E-42 |
| SLC7A5   | 2.585534 | 6.999182 | 1.91E-43 | 1.62E-42 |
| RTBDN    | 6.247957 | 1.138921 | 3.69E-43 | 3.11E-42 |
| KLF14    | -2.04408 | -1.42835 | 4.58E-43 | 3.85E-42 |
| HIST1H2B | 2.686693 | 3.038803 | 5.07E-43 | 4.25E-42 |
| SGCG     | -2.65988 | 1.313097 | 7.19E-43 | 6.01E-42 |
| TMEM92   | 2.581461 | 0.436447 | 7.22E-43 | 6.03E-42 |
| SHOX     | -2.22318 | -3.56376 | 1.48E-42 | 1.23E-41 |
| HOXC11   | 3.564371 | 3.183391 | 2.07E-42 | 1.71E-41 |
| CBX2     | 2.670812 | 4.666209 | 2.11E-42 | 1.74E-41 |
| HRASLS5  | -2.17677 | 4.089946 | 3.56E-42 | 2.91E-41 |
| HAS1     | -2.27244 | 0.57861  | 3.73E-42 | 3.05E-41 |
| GABRG1   | -2.3921  | -3.34346 | 4.38E-42 | 3.58E-41 |
| PLCXD3   | -2.22812 | 1.002815 | 4.99E-42 | 4.06E-41 |
| HIST1H2B | 2.567881 | 1.845119 | 6.13E-42 | 4.98E-41 |
| HIST2H2B | 2.012762 | 6.339522 | 6.96E-42 | 5.64E-41 |
| MYBPC1   | -3.21469 | 6.435795 | 9.04E-42 | 7.29E-41 |
| MUC1     | 2.529381 | 9.154924 | 1.37E-41 | 1.10E-40 |
| LRRC46   | 2.098415 | 2.565311 | 1.67E-41 | 1.34E-40 |
| MRLN     | -3.00785 | -3.42228 | 1.84E-41 | 1.47E-40 |
| C10orf90 | -2.45103 | 0.442729 | 2.60E-41 | 2.07E-40 |
| TRPM1    | -2.1818  | -3.28663 | 2.63E-41 | 2.09E-40 |
| SLC14A2  | -2.18151 | 0.516623 | 3.08E-41 | 2.45E-40 |
| METTL21C | -2.88452 | -3.84338 | 3.65E-41 | 2.89E-40 |
| CAPS     | 2.168728 | 5.590282 | 3.96E-41 | 3.13E-40 |
| TRPA1    | 6.293297 | 3.990479 | 5.69E-41 | 4.48E-40 |
| ZMYND1C  | 2.524117 | 3.873941 | 6.16E-41 | 4.85E-40 |
| GRIN2D   | 2.191338 | 2.200968 | 7.02E-41 | 5.51E-40 |
| HIST1H4D | 4.289857 | -0.58567 | 8.19E-41 | 6.42E-40 |
| KLK4     | 3.079219 | 1.727741 | 9.62E-41 | 7.53E-40 |
| MYT1     | 4.490618 | 1.981046 | 1.20E-40 | 9.34E-40 |
| MAS1L    | -2.19812 | -3.00356 | 1.43E-40 | 1.12E-39 |
| LRRC73   | 2.076647 | 1.597977 | 1.47E-40 | 1.15E-39 |
| ACTL8    | 7.829443 | 2.401766 | 2.33E-40 | 1.81E-39 |
| APOBEC3I | 2.56553  | 3.444053 | 2.45E-40 | 1.90E-39 |
| SYT13    | 4.999725 | 6.059779 | 2.57E-40 | 1.98E-39 |
| IGFL3    | 4.872312 | -0.80871 | 2.96E-40 | 2.28E-39 |
| BMPER    | -2.05138 | 1.371006 | 3.23E-40 | 2.49E-39 |
| IGFL2    | 3.197942 | 0.850174 | 4.52E-40 | 3.47E-39 |

|          |          |          |          |          |
|----------|----------|----------|----------|----------|
| ERMN     | 2.550753 | 1.041196 | 7.89E-40 | 6.01E-39 |
| ACAN     | 4.291901 | 4.05783  | 8.48E-40 | 6.45E-39 |
| CIB3     | 3.034227 | -0.6648  | 9.04E-40 | 6.87E-39 |
| ENTHD1   | 2.824743 | -1.30093 | 1.16E-39 | 8.82E-39 |
| MYF6     | -4.10029 | -0.65775 | 1.36E-39 | 1.03E-38 |
| OR2L13   | -2.38119 | -2.58384 | 1.43E-39 | 1.08E-38 |
| NOS1     | -2.66468 | -0.17059 | 1.49E-39 | 1.12E-38 |
| ULBP1    | 3.072344 | 0.77714  | 1.71E-39 | 1.29E-38 |
| RIIAD1   | 3.330365 | -0.03642 | 2.09E-39 | 1.57E-38 |
| HIST1H3B | 5.477219 | -0.45343 | 4.79E-39 | 3.54E-38 |
| LINGO1   | 2.49282  | 4.587474 | 5.60E-39 | 4.13E-38 |
| MYOG     | -3.18527 | -1.94776 | 6.96E-39 | 5.11E-38 |
| CNTNAP2  | 3.96239  | 5.276674 | 7.16E-39 | 5.25E-38 |
| CFB      | 2.545317 | 5.907752 | 8.44E-39 | 6.17E-38 |
| ASTN1    | -2.00234 | 0.765722 | 1.09E-38 | 7.97E-38 |
| DNAAF3   | 2.426081 | 1.945027 | 1.29E-38 | 9.39E-38 |
| KISS1R   | 4.166424 | 0.423299 | 1.38E-38 | 1.01E-37 |
| KCNA1    | -2.09747 | -0.21222 | 1.40E-38 | 1.02E-37 |
| LYPD1    | 2.227504 | 0.700354 | 1.99E-38 | 1.44E-37 |
| FAM57B   | 2.850455 | 1.225505 | 2.00E-38 | 1.45E-37 |
| FOXH1    | 2.256442 | -1.47086 | 2.82E-38 | 2.03E-37 |
| CDKN2A   | 2.74289  | 4.372738 | 2.92E-38 | 2.10E-37 |
| LRTM2    | 5.531919 | 0.890962 | 3.40E-38 | 2.44E-37 |
| OASL     | 2.345322 | 4.356728 | 4.55E-38 | 3.25E-37 |
| HIST1H2B | 3.855083 | 0.040807 | 5.82E-38 | 4.15E-37 |
| GMNC     | -3.00325 | -3.85945 | 5.86E-38 | 4.18E-37 |
| FAM72C   | 2.68006  | -1.5175  | 7.36E-38 | 5.24E-37 |
| HIST1H4E | 4.063629 | 0.630599 | 9.62E-38 | 6.83E-37 |
| CRABP2   | 2.138656 | 9.080829 | 1.10E-37 | 7.79E-37 |
| LRFN2    | 2.754587 | -0.01011 | 1.41E-37 | 9.92E-37 |
| ACTC1    | -2.46497 | 0.061414 | 1.87E-37 | 1.32E-36 |
| MAPK15   | 2.685449 | 4.033544 | 2.34E-37 | 1.64E-36 |
| HIST2H2B | 2.698475 | 1.827124 | 2.77E-37 | 1.94E-36 |
| NPW      | 4.116868 | 0.72464  | 2.79E-37 | 1.96E-36 |
| CLDN8    | -2.10282 | 3.849336 | 2.96E-37 | 2.07E-36 |
| CSMD2    | 2.079125 | 1.940036 | 3.48E-37 | 2.43E-36 |
| MROH6    | 2.004054 | 3.737378 | 4.01E-37 | 2.79E-36 |
| SPEF1    | 2.433054 | 1.504702 | 4.20E-37 | 2.92E-36 |
| HIST1H4H | 2.634976 | 3.04826  | 5.83E-37 | 4.03E-36 |
| IL17B    | -2.06996 | 0.349418 | 7.96E-37 | 5.49E-36 |
| PLPPR1   | -2.27281 | -0.42404 | 1.14E-36 | 7.80E-36 |
| CXCL9    | 3.153151 | 6.703692 | 1.29E-36 | 8.85E-36 |
| ITIH2    | -2.233   | 1.031256 | 1.38E-36 | 9.44E-36 |
| DEGS2    | 2.52265  | 6.239493 | 1.49E-36 | 1.02E-35 |
| TGFBR3L  | 3.090293 | -0.59662 | 1.67E-36 | 1.14E-35 |
| CALB2    | -2.10739 | 4.321715 | 1.82E-36 | 1.25E-35 |
| HIST1H4K | 2.459176 | -1.53858 | 2.10E-36 | 1.43E-35 |
| OR10A3   | -2.50803 | -4.17303 | 2.66E-36 | 1.80E-35 |
| UNC13A   | 3.937204 | 2.192526 | 3.00E-36 | 2.03E-35 |
| ATP1A3   | 3.213245 | 2.066756 | 3.13E-36 | 2.12E-35 |
| DMBX1    | 3.125839 | -0.43726 | 3.16E-36 | 2.14E-35 |
| AMZ1     | 2.669241 | 2.159025 | 3.58E-36 | 2.42E-35 |
| CPNE7    | 2.58148  | 3.286973 | 3.82E-36 | 2.57E-35 |
| HIST2H2A | 3.028531 | 0.634074 | 4.11E-36 | 2.76E-35 |
| KCNJ10   | 2.391416 | 0.369089 | 5.54E-36 | 3.71E-35 |
| CCL13    | -2.03404 | 1.087061 | 7.20E-36 | 4.80E-35 |
| HIST1H1C | 2.273388 | 6.493664 | 9.49E-36 | 6.30E-35 |
| FOXJ1    | 4.476146 | 2.739991 | 9.62E-36 | 6.38E-35 |

|          |          |          |          |          |
|----------|----------|----------|----------|----------|
| PPP2R2C  | 3.498858 | 4.516518 | 1.13E-35 | 7.49E-35 |
| WT1      | 4.574947 | 2.427792 | 1.26E-35 | 8.31E-35 |
| RDH16    | 2.660016 | 1.747741 | 1.67E-35 | 1.10E-34 |
| MYBL1    | 2.140424 | 4.261771 | 1.67E-35 | 1.10E-34 |
| NPY2R    | -3.51668 | 1.305039 | 1.73E-35 | 1.14E-34 |
| TMEM249  | 2.563322 | -1.56494 | 1.87E-35 | 1.23E-34 |
| PLPPR5   | 3.138614 | -1.61389 | 2.21E-35 | 1.45E-34 |
| CAPN9    | 2.71579  | 3.11253  | 2.42E-35 | 1.59E-34 |
| IL9R     | 2.076828 | -1.06243 | 2.52E-35 | 1.65E-34 |
| HPN      | 2.23026  | 5.497889 | 3.03E-35 | 1.97E-34 |
| OTX1     | 2.522883 | 2.032462 | 4.04E-35 | 2.63E-34 |
| PRR15    | 2.379309 | 5.244786 | 4.16E-35 | 2.70E-34 |
| HIST1H4J | 2.396335 | -1.94293 | 4.36E-35 | 2.83E-34 |
| NAT1     | 3.243216 | 7.102752 | 4.43E-35 | 2.88E-34 |
| TEX19    | 4.739409 | -1.19109 | 4.91E-35 | 3.18E-34 |
| HIST1H2A | 4.111456 | -2.11757 | 5.03E-35 | 3.25E-34 |
| COL22A1  | 3.065708 | 3.160183 | 6.05E-35 | 3.91E-34 |
| SLC27A6  | -2.06026 | 2.120074 | 8.38E-35 | 5.38E-34 |
| ARMC3    | 2.853482 | 1.435313 | 1.10E-34 | 7.04E-34 |
| KCNH8    | -2.00809 | 0.24909  | 1.15E-34 | 7.32E-34 |
| MEX3A    | 2.042888 | 5.663386 | 1.15E-34 | 7.34E-34 |
| CAPSL    | 3.952147 | 0.404639 | 1.59E-34 | 1.01E-33 |
| SCGB1A1  | -3.71718 | -0.55112 | 1.89E-34 | 1.20E-33 |
| NLGN1    | -2.08441 | 0.432157 | 2.13E-34 | 1.35E-33 |
| SCUBE3   | 2.883978 | 4.497328 | 2.47E-34 | 1.56E-33 |
| KCNG3    | 2.775533 | -0.79119 | 2.99E-34 | 1.88E-33 |
| CBLN2    | 6.073543 | 3.941962 | 3.64E-34 | 2.28E-33 |
| HIST1H2B | 3.53077  | -1.38228 | 4.26E-34 | 2.67E-33 |
| MMP9     | 3.314677 | 7.345019 | 4.73E-34 | 2.96E-33 |
| LHFPL5   | 3.778291 | -0.47272 | 4.93E-34 | 3.08E-33 |
| NT5DC4   | 3.032175 | -1.99895 | 5.60E-34 | 3.49E-33 |
| SLC44A4  | 2.559696 | 6.998095 | 8.11E-34 | 5.04E-33 |
| RAMP1    | 2.651615 | 4.266824 | 1.03E-33 | 6.39E-33 |
| RHBG     | 2.658906 | 0.372313 | 1.04E-33 | 6.47E-33 |
| GAL3ST2  | 4.022117 | 0.014605 | 1.42E-33 | 8.79E-33 |
| RET      | 2.917048 | 6.10051  | 1.43E-33 | 8.80E-33 |
| FGD3     | 2.051414 | 5.921859 | 1.64E-33 | 1.01E-32 |
| HIST1H2A | 5.061813 | -2.05416 | 1.87E-33 | 1.15E-32 |
| CSAG1    | 8.247115 | 0.440604 | 2.14E-33 | 1.32E-32 |
| ARNT2    | 2.054904 | 6.134829 | 2.16E-33 | 1.33E-32 |
| HOXC10   | 2.486862 | 5.314339 | 2.83E-33 | 1.73E-32 |
| EDN2     | 2.512679 | 2.88564  | 3.05E-33 | 1.86E-32 |
| BMPR1B   | 4.254437 | 7.585995 | 3.22E-33 | 1.97E-32 |
| SYT5     | 4.182798 | 0.647239 | 3.22E-33 | 1.97E-32 |
| KCNK15   | 2.500088 | 4.092771 | 3.92E-33 | 2.39E-32 |
| SPP1     | 2.296042 | 8.060331 | 4.05E-33 | 2.47E-32 |
| MOGAT1   | -2.25955 | -3.05094 | 4.16E-33 | 2.53E-32 |
| PARD6B   | 2.18228  | 5.761905 | 4.24E-33 | 2.58E-32 |
| PCSK1    | 6.444938 | 5.882495 | 4.63E-33 | 2.81E-32 |
| C11orf87 | -2.23613 | -2.95369 | 4.89E-33 | 2.96E-32 |
| ELAVL2   | 2.614651 | 1.787419 | 5.46E-33 | 3.30E-32 |
| AQP4     | -2.22564 | 0.946397 | 6.23E-33 | 3.75E-32 |
| CYP1A2   | -2.22546 | -4.15199 | 8.70E-33 | 5.21E-32 |
| TPPP2    | -2.17811 | -2.90602 | 9.45E-33 | 5.65E-32 |
| SAMD11   | 2.675648 | 3.04938  | 1.03E-32 | 6.15E-32 |
| UMODL1   | 2.825952 | 0.744425 | 1.11E-32 | 6.60E-32 |
| CGA      | 8.679306 | 4.647876 | 1.13E-32 | 6.77E-32 |
| NELL2    | 3.260161 | 5.668971 | 1.41E-32 | 8.39E-32 |

|          |          |          |          |          |
|----------|----------|----------|----------|----------|
| FBXL16   | 2.024634 | 5.096983 | 1.74E-32 | 1.03E-31 |
| SLC7A11  | 2.209611 | 3.355931 | 1.99E-32 | 1.18E-31 |
| CADPS    | 3.278566 | 1.049008 | 2.03E-32 | 1.20E-31 |
| AADAC    | -2.9501  | 0.28859  | 2.22E-32 | 1.32E-31 |
| MIEN1    | 2.031536 | 6.525836 | 2.29E-32 | 1.35E-31 |
| VGFB     | 3.782452 | 0.753475 | 2.39E-32 | 1.41E-31 |
| GBP5     | 2.516632 | 4.844401 | 2.41E-32 | 1.42E-31 |
| ADAMDEC1 | 2.766069 | 3.221957 | 2.71E-32 | 1.60E-31 |
| HIST1H1E | 4.135405 | 1.339632 | 2.74E-32 | 1.61E-31 |
| IL19     | 5.292986 | 0.063691 | 2.78E-32 | 1.64E-31 |
| SPDYC    | 7.284498 | 2.645958 | 2.84E-32 | 1.67E-31 |
| CEACAM6  | 4.308119 | 7.720848 | 4.11E-32 | 2.40E-31 |
| PF4      | -2.40803 | -3.80202 | 5.66E-32 | 3.30E-31 |
| CLGN     | 2.644946 | 4.340123 | 5.78E-32 | 3.36E-31 |
| TLX1     | 5.80509  | 1.021189 | 5.79E-32 | 3.37E-31 |
| HIST1H1B | 5.039154 | -0.01735 | 6.18E-32 | 3.59E-31 |
| SLC4A1   | -2.04721 | -2.95869 | 6.28E-32 | 3.65E-31 |
| NMU      | 3.685758 | 1.048659 | 7.95E-32 | 4.61E-31 |
| GDA      | -2.51207 | -1.69197 | 8.37E-32 | 4.85E-31 |
| MUC2     | 8.772446 | 5.548303 | 8.49E-32 | 4.91E-31 |
| TINCR    | 2.573404 | 4.174247 | 9.96E-32 | 5.76E-31 |
| KCNA4    | -2.80244 | -2.73134 | 9.98E-32 | 5.77E-31 |
| CHST6    | 2.22103  | 1.845639 | 9.99E-32 | 5.77E-31 |
| SPOCD1   | 2.155834 | 2.468118 | 1.11E-31 | 6.41E-31 |
| DMP1     | 4.886161 | -0.98601 | 1.17E-31 | 6.72E-31 |
| AMH      | 2.699285 | 1.172749 | 1.35E-31 | 7.79E-31 |
| TMEM190  | 2.743919 | -1.89919 | 1.39E-31 | 7.98E-31 |
| CLDN9    | 2.734524 | 0.798091 | 1.43E-31 | 8.20E-31 |
| GABRQ    | 5.7176   | 2.032544 | 1.97E-31 | 1.13E-30 |
| IL17REL  | 3.129791 | 0.083904 | 1.99E-31 | 1.14E-30 |
| CFAP47   | 3.057349 | 0.089724 | 2.43E-31 | 1.38E-30 |
| NSG2     | 5.845792 | 2.436888 | 2.87E-31 | 1.63E-30 |
| HS3ST4   | -2.75746 | 0.072844 | 2.93E-31 | 1.66E-30 |
| KCNH1    | 3.010723 | 1.582106 | 3.01E-31 | 1.70E-30 |
| TAS1R3   | 2.141506 | 1.348334 | 3.14E-31 | 1.78E-30 |
| CA9      | 4.771486 | 2.689482 | 3.68E-31 | 2.08E-30 |
| LY6H     | 2.35288  | -0.15229 | 3.95E-31 | 2.22E-30 |
| CHRNA9   | 6.702169 | 2.84987  | 4.44E-31 | 2.50E-30 |
| CCDC187  | 4.673714 | -1.19067 | 4.48E-31 | 2.52E-30 |
| TMEM215  | 3.960136 | -0.89145 | 4.54E-31 | 2.55E-30 |
| APLP1    | 2.600374 | 3.908497 | 5.71E-31 | 3.19E-30 |
| HIST1H3C | 3.723076 | -1.81555 | 5.78E-31 | 3.23E-30 |
| C19orf33 | 2.77796  | 4.163108 | 6.40E-31 | 3.57E-30 |
| MS4A15   | 4.187255 | 1.962852 | 1.14E-30 | 6.31E-30 |
| FGFR3    | 2.396279 | 4.996782 | 1.48E-30 | 8.17E-30 |
| IGFALS   | 2.864824 | 2.176016 | 1.60E-30 | 8.82E-30 |
| 10-Mar   | 2.593362 | -0.42984 | 1.62E-30 | 8.93E-30 |
| CD177    | 4.904741 | 3.236401 | 2.64E-30 | 1.44E-29 |
| CELF3    | 4.490537 | -0.09863 | 2.91E-30 | 1.58E-29 |
| ENTPD8   | 2.686775 | 2.051308 | 2.99E-30 | 1.63E-29 |
| HIST1H1T | 3.516872 | -2.92328 | 3.54E-30 | 1.92E-29 |
| INSYN2   | 3.711197 | 3.821932 | 5.65E-30 | 3.04E-29 |
| HOXB9    | 2.618152 | 1.423339 | 5.85E-30 | 3.15E-29 |
| HIST1H3G | 3.013045 | 0.593009 | 6.00E-30 | 3.23E-29 |
| EMX1     | 3.589    | 1.395462 | 7.29E-30 | 3.92E-29 |
| SGCZ     | -2.63702 | -3.60179 | 7.70E-30 | 4.13E-29 |
| MX1      | 3.164675 | 0.844421 | 8.33E-30 | 4.46E-29 |
| TERT     | 2.769067 | -0.90193 | 8.45E-30 | 4.52E-29 |

|          |          |          |          |          |
|----------|----------|----------|----------|----------|
| CCDC151  | 2.169101 | 0.958141 | 8.52E-30 | 4.56E-29 |
| HHIPL2   | 3.196564 | 1.708403 | 8.56E-30 | 4.58E-29 |
| HIST1H1D | 3.588602 | 0.536122 | 8.58E-30 | 4.59E-29 |
| TF       | -2.17089 | 5.053185 | 9.34E-30 | 4.99E-29 |
| RCOR2    | 2.323504 | 2.672261 | 9.39E-30 | 5.01E-29 |
| CST6     | 2.627865 | 2.043368 | 9.85E-30 | 5.25E-29 |
| BRSK2    | 2.840497 | 1.454987 | 1.28E-29 | 6.79E-29 |
| TMEM151  | 3.700141 | -0.98814 | 1.46E-29 | 7.72E-29 |
| HIST1H2B | 2.373025 | 2.711694 | 1.46E-29 | 7.72E-29 |
| INSM1    | 5.238746 | 2.910103 | 1.49E-29 | 7.87E-29 |
| CLPSL1   | 3.004099 | 1.446816 | 1.50E-29 | 7.92E-29 |
| SIM2     | 2.230255 | 3.249043 | 1.67E-29 | 8.81E-29 |
| MSLNL    | 4.03121  | -1.2879  | 1.82E-29 | 9.59E-29 |
| IGF2BP1  | 3.699995 | -0.1187  | 1.84E-29 | 9.72E-29 |
| CHRND    | -3.26998 | -2.40789 | 1.93E-29 | 1.02E-28 |
| PNCK     | 2.575334 | 1.360557 | 1.99E-29 | 1.05E-28 |
| SCX      | 2.04551  | 0.364198 | 2.22E-29 | 1.16E-28 |
| GNG3     | 2.865948 | -0.28853 | 2.47E-29 | 1.30E-28 |
| SLC16A6  | 2.472983 | 5.381684 | 3.06E-29 | 1.60E-28 |
| AOC1     | 3.518087 | 2.013592 | 3.70E-29 | 1.94E-28 |
| HIST3H2A | 2.053066 | 4.160973 | 3.70E-29 | 1.94E-28 |
| NKX6-1   | 2.767832 | 1.18639  | 4.13E-29 | 2.15E-28 |
| SAA4     | -2.02637 | -1.14193 | 5.07E-29 | 2.64E-28 |
| BBOX1    | -2.04959 | 3.134404 | 5.65E-29 | 2.93E-28 |
| HIST1H4C | 4.471271 | -0.46885 | 6.14E-29 | 3.18E-28 |
| HIST1H3F | 4.642253 | -1.26471 | 6.52E-29 | 3.37E-28 |
| KCNE4    | 2.607641 | 6.286804 | 7.34E-29 | 3.79E-28 |
| KRT37    | 3.29405  | -1.43865 | 8.26E-29 | 4.26E-28 |
| PRAC2    | 5.9002   | -1.33301 | 9.83E-29 | 5.06E-28 |
| FSIP1    | 2.703671 | 4.193902 | 1.00E-28 | 5.15E-28 |
| CASP14   | 6.711314 | 5.302832 | 1.14E-28 | 5.84E-28 |
| HIST1H2B | 5.061525 | -2.3863  | 1.19E-28 | 6.08E-28 |
| LKAAEAR1 | 2.801699 | -2.50764 | 1.23E-28 | 6.30E-28 |
| DLX4     | 2.036798 | 0.969241 | 1.32E-28 | 6.76E-28 |
| LCN1     | 3.025979 | -3.52148 | 1.57E-28 | 8.01E-28 |
| FUT7     | 2.018358 | -0.40885 | 1.78E-28 | 9.08E-28 |
| GDF15    | 2.408656 | 4.484402 | 1.88E-28 | 9.55E-28 |
| KISS1    | 2.698256 | -1.52514 | 2.09E-28 | 1.06E-27 |
| KCNK9    | 3.055985 | -1.26352 | 2.40E-28 | 1.22E-27 |
| TYRP1    | 4.125675 | 1.173635 | 2.44E-28 | 1.24E-27 |
| CACNG4   | 2.409075 | 6.557739 | 2.58E-28 | 1.31E-27 |
| TSPAN1   | 2.454395 | 6.632114 | 2.80E-28 | 1.42E-27 |
| AADA3L3  | -3.06468 | -3.74485 | 3.13E-28 | 1.58E-27 |
| CFAP99   | 2.013476 | -0.35137 | 3.25E-28 | 1.64E-27 |
| MMP3     | 2.288171 | 3.89007  | 4.33E-28 | 2.17E-27 |
| F7       | 2.798205 | 3.059599 | 4.66E-28 | 2.33E-27 |
| EPO      | 3.886439 | 0.039627 | 4.82E-28 | 2.41E-27 |
| FCRLB    | 3.174022 | 2.942276 | 4.86E-28 | 2.43E-27 |
| PVALB    | 4.955131 | 3.818119 | 5.02E-28 | 2.50E-27 |
| KCNJ3    | 5.198765 | 5.831902 | 5.05E-28 | 2.52E-27 |
| DIO1     | 3.517445 | 3.614958 | 5.05E-28 | 2.52E-27 |
| CYP21A2  | 2.321865 | 1.635722 | 5.33E-28 | 2.65E-27 |
| OPRD1    | 2.789266 | 1.681253 | 8.84E-28 | 4.36E-27 |
| SIX2     | 2.30593  | 3.203001 | 9.71E-28 | 4.79E-27 |
| ORM1     | 5.891323 | 3.18643  | 9.82E-28 | 4.84E-27 |
| MMP10    | 3.109204 | 2.396583 | 1.01E-27 | 4.98E-27 |
| SPHKAP   | -2.71076 | 0.271486 | 1.09E-27 | 5.37E-27 |
| FABP6    | 4.283554 | 0.056805 | 1.11E-27 | 5.43E-27 |

|          |          |          |          |          |
|----------|----------|----------|----------|----------|
| ABCB11   | -2.01342 | -2.01132 | 1.20E-27 | 5.90E-27 |
| ADAMTS2  | 4.293909 | -1.88548 | 1.35E-27 | 6.61E-27 |
| IFNL2    | 4.265872 | -3.29876 | 1.36E-27 | 6.64E-27 |
| RUFY4    | 2.388262 | 0.423613 | 1.55E-27 | 7.55E-27 |
| FGF5     | 3.837446 | -1.57647 | 1.81E-27 | 8.81E-27 |
| SLC30A8  | 5.854535 | 5.943206 | 1.89E-27 | 9.20E-27 |
| TNR      | 2.881973 | 0.675921 | 2.18E-27 | 1.06E-26 |
| RGS8     | 2.37079  | -1.19383 | 2.33E-27 | 1.13E-26 |
| RIMS4    | 3.333844 | 4.956272 | 2.58E-27 | 1.25E-26 |
| ADGRF4   | 3.381505 | -0.15945 | 2.74E-27 | 1.32E-26 |
| GJA3     | 2.244028 | -1.37773 | 2.74E-27 | 1.33E-26 |
| IFNL3    | 4.047185 | -3.27226 | 2.75E-27 | 1.33E-26 |
| EPHA8    | 3.660985 | 0.403943 | 2.83E-27 | 1.37E-26 |
| LHCGR    | -2.85618 | -1.3661  | 2.99E-27 | 1.44E-26 |
| CALHM1   | 2.859556 | -1.47364 | 3.05E-27 | 1.47E-26 |
| CST5     | 7.904097 | 3.610073 | 3.21E-27 | 1.55E-26 |
| MIOX     | 2.17855  | -2.20641 | 3.30E-27 | 1.59E-26 |
| HOXB13   | 5.65068  | 2.440054 | 3.50E-27 | 1.68E-26 |
| BPIFB1   | 3.988433 | 5.506903 | 3.59E-27 | 1.72E-26 |
| HIST1H2A | 2.246543 | 2.163764 | 4.22E-27 | 2.02E-26 |
| TIGIT    | 2.046607 | 2.838832 | 5.38E-27 | 2.57E-26 |
| CEACAM5  | 4.359062 | 5.675295 | 5.40E-27 | 2.57E-26 |
| ZBED2    | 2.500882 | 0.307638 | 6.10E-27 | 2.90E-26 |
| CDH2     | 2.571963 | 3.671459 | 7.17E-27 | 3.41E-26 |
| CLDN25   | 3.862334 | -2.81193 | 7.24E-27 | 3.44E-26 |
| PLEKHD1  | 2.456758 | 2.497068 | 7.86E-27 | 3.72E-26 |
| PRAME    | 4.911326 | 4.85277  | 8.35E-27 | 3.95E-26 |
| KIF1A    | 4.275785 | 4.110364 | 1.02E-26 | 4.81E-26 |
| KCNJ6    | 2.932595 | 0.241267 | 1.06E-26 | 4.99E-26 |
| PIGR     | -2.28632 | 6.510744 | 1.09E-26 | 5.13E-26 |
| MAEL     | 4.37622  | 1.074229 | 1.27E-26 | 5.95E-26 |
| AKR7A3   | 2.577135 | 4.76302  | 1.65E-26 | 7.73E-26 |
| TMEFF2   | -2.16561 | -3.05162 | 1.73E-26 | 8.09E-26 |
| MAB21L4  | 3.490266 | 4.115633 | 1.80E-26 | 8.38E-26 |
| PMCH     | 2.284193 | -3.50298 | 1.84E-26 | 8.60E-26 |
| HOXC12   | 4.08217  | 2.519484 | 2.10E-26 | 9.79E-26 |
| APOA1    | 3.679871 | 0.128548 | 3.09E-26 | 1.43E-25 |
| AC004233 | 3.629822 | -0.77076 | 3.31E-26 | 1.53E-25 |
| CLPS     | 2.980905 | -1.24004 | 4.03E-26 | 1.86E-25 |
| DLX5     | 2.526049 | 1.406774 | 4.86E-26 | 2.23E-25 |
| LIX1     | 3.680301 | -1.54716 | 5.59E-26 | 2.56E-25 |
| KLHDC7B  | 2.908735 | 4.362346 | 6.02E-26 | 2.75E-25 |
| MRGPRX3  | -2.15268 | -0.81148 | 6.90E-26 | 3.14E-25 |
| OSTN     | -2.46597 | -3.62215 | 8.65E-26 | 3.93E-25 |
| SLC6A4   | 3.797732 | 3.864963 | 9.05E-26 | 4.10E-25 |
| CABP7    | 2.298382 | -0.38373 | 1.18E-25 | 5.32E-25 |
| ONECUT2  | 3.328376 | 1.979808 | 1.30E-25 | 5.85E-25 |
| JPH3     | 2.403102 | 0.682969 | 1.32E-25 | 5.94E-25 |
| CLDN6    | 4.810484 | 1.266213 | 1.35E-25 | 6.07E-25 |
| SOX11    | 3.008698 | 4.028941 | 1.40E-25 | 6.28E-25 |
| TRH      | 5.73014  | 4.665237 | 1.43E-25 | 6.40E-25 |
| HIST1H3I | 5.590592 | -2.66203 | 1.47E-25 | 6.57E-25 |
| FABP9    | -2.87702 | -4.18452 | 1.58E-25 | 7.07E-25 |
| BCAS1    | 2.447477 | 5.448295 | 1.63E-25 | 7.31E-25 |
| PYDC1    | 4.451553 | 2.648545 | 1.72E-25 | 7.70E-25 |
| C1orf194 | 2.250343 | -0.31573 | 1.78E-25 | 7.96E-25 |
| GAD1     | 3.299188 | 1.598358 | 2.00E-25 | 8.91E-25 |
| SLCO1A2  | -2.44702 | 0.194378 | 2.90E-25 | 1.28E-24 |

|          |          |          |          |          |
|----------|----------|----------|----------|----------|
| IL20     | 3.448446 | 2.381186 | 3.10E-25 | 1.37E-24 |
| TNNI3    | 3.59757  | 0.779246 | 3.74E-25 | 1.65E-24 |
| SPINK4   | 3.678822 | -0.74189 | 3.75E-25 | 1.65E-24 |
| INHA     | 2.815389 | 1.701458 | 4.04E-25 | 1.78E-24 |
| MYOD1    | -3.43267 | -2.97069 | 4.48E-25 | 1.97E-24 |
| SUSD3    | 2.107175 | 5.846553 | 4.85E-25 | 2.12E-24 |
| MINDY4B  | 2.355618 | -1.30037 | 4.94E-25 | 2.16E-24 |
| VSTM2L   | 2.660645 | 2.547645 | 5.37E-25 | 2.35E-24 |
| NEURL1   | 2.57932  | 3.888497 | 5.55E-25 | 2.42E-24 |
| MAST1    | 2.049956 | 1.056786 | 5.94E-25 | 2.59E-24 |
| FOXD3    | 3.037958 | -0.59177 | 6.18E-25 | 2.69E-24 |
| FSD1     | 2.8504   | -0.27719 | 6.22E-25 | 2.71E-24 |
| CDC20B   | 5.161094 | 2.834754 | 6.68E-25 | 2.90E-24 |
| NXPH4    | 2.421771 | 2.823375 | 7.10E-25 | 3.08E-24 |
| PTCHD1   | -2.00067 | 2.538533 | 7.18E-25 | 3.11E-24 |
| FOXD1    | 2.936425 | 0.809397 | 7.73E-25 | 3.35E-24 |
| CCL24    | -2.13483 | -1.82381 | 9.63E-25 | 4.15E-24 |
| CRYBA2   | 4.683499 | -1.53978 | 9.77E-25 | 4.21E-24 |
| HIST2H2A | 4.040861 | -1.52485 | 1.08E-24 | 4.63E-24 |
| GABRA5   | 5.745216 | -0.76444 | 1.16E-24 | 4.98E-24 |
| ORM2     | 4.464492 | 2.058938 | 1.24E-24 | 5.32E-24 |
| XKR7     | 4.843585 | 0.420363 | 1.27E-24 | 5.46E-24 |
| PPM1E    | 2.295527 | 1.686008 | 1.48E-24 | 6.34E-24 |
| MAGEA1   | 7.727154 | 1.153523 | 1.70E-24 | 7.23E-24 |
| NOTUM    | 2.500238 | 0.140821 | 1.90E-24 | 8.07E-24 |
| HS6ST3   | 2.852905 | 3.662466 | 2.13E-24 | 9.05E-24 |
| TRPM5    | 3.701298 | -1.51764 | 2.20E-24 | 9.34E-24 |
| GPR37L1  | 2.184465 | 0.672291 | 2.21E-24 | 9.37E-24 |
| RUNDC3A  | 3.175183 | 2.294861 | 2.23E-24 | 9.46E-24 |
| LCN12    | 2.021355 | 1.528337 | 3.31E-24 | 1.39E-23 |
| MCIDAS   | 2.697852 | 0.998195 | 3.64E-24 | 1.53E-23 |
| EDN3     | -2.40751 | 1.796303 | 3.82E-24 | 1.60E-23 |
| CARD17   | 2.945071 | -2.34191 | 3.84E-24 | 1.61E-23 |
| CACNA1H  | 2.341861 | 5.357901 | 4.16E-24 | 1.74E-23 |
| CDH12    | -2.32869 | -0.75703 | 4.47E-24 | 1.87E-23 |
| CCDC185  | 2.81731  | -2.18393 | 5.21E-24 | 2.17E-23 |
| SYT1     | 2.959617 | 5.214852 | 5.51E-24 | 2.29E-23 |
| ASCL2    | 2.064642 | 2.245907 | 5.81E-24 | 2.42E-23 |
| HIST1H4B | 4.616641 | -1.51688 | 5.89E-24 | 2.45E-23 |
| MYO3B    | 3.319089 | 2.637747 | 6.04E-24 | 2.51E-23 |
| TUBA3D   | 2.883602 | 2.758526 | 6.09E-24 | 2.53E-23 |
| HMGA2    | 2.615322 | 0.058416 | 6.47E-24 | 2.68E-23 |
| SPACA4   | 2.049837 | -1.51354 | 6.53E-24 | 2.71E-23 |
| PLA2G4D  | 2.386169 | -1.28199 | 6.64E-24 | 2.75E-23 |
| GDPD2    | 2.854644 | 0.174935 | 6.86E-24 | 2.84E-23 |
| DISP3    | 2.231959 | 0.891272 | 8.40E-24 | 3.47E-23 |
| CCNO     | 2.44763  | 3.708139 | 8.46E-24 | 3.49E-23 |
| CCL7     | 3.628211 | -0.71552 | 9.06E-24 | 3.73E-23 |
| CHST1    | 2.070774 | 4.592322 | 1.20E-23 | 4.93E-23 |
| SYN1     | 2.086427 | 1.687107 | 1.56E-23 | 6.36E-23 |
| IGFBPL1  | 2.452353 | -0.79325 | 1.63E-23 | 6.63E-23 |
| KCNJ16   | -2.32141 | 1.292305 | 1.63E-23 | 6.65E-23 |
| CCL20    | 2.48216  | 0.551569 | 2.07E-23 | 8.41E-23 |
| MSMB     | 4.072211 | 4.452335 | 2.24E-23 | 9.08E-23 |
| UNC5A    | 2.32862  | 3.130536 | 2.72E-23 | 1.10E-22 |
| EFNA2    | 3.386618 | -2.72679 | 3.22E-23 | 1.30E-22 |
| C1orf189 | 2.063845 | -1.69938 | 3.42E-23 | 1.38E-22 |
| DNAJC12  | 2.081772 | 5.509275 | 4.21E-23 | 1.69E-22 |

|          |          |          |          |          |
|----------|----------|----------|----------|----------|
| SERPINB7 | 3.583655 | 1.209967 | 4.94E-23 | 1.97E-22 |
| DOK7     | 2.315135 | 3.31554  | 5.06E-23 | 2.02E-22 |
| PGA5     | -2.26822 | -3.80486 | 5.62E-23 | 2.24E-22 |
| RNASE10  | 2.308737 | -2.62326 | 6.02E-23 | 2.40E-22 |
| ZPLD1    | 3.375835 | 1.757231 | 6.61E-23 | 2.63E-22 |
| PRLH     | 2.905613 | -3.17988 | 7.01E-23 | 2.78E-22 |
| HIST1H2A | 3.921592 | -2.60248 | 7.78E-23 | 3.08E-22 |
| PROZ     | 2.094638 | -1.1128  | 8.12E-23 | 3.22E-22 |
| KCNH6    | 3.882811 | -0.75534 | 9.70E-23 | 3.83E-22 |
| SMC1B    | 2.276076 | 1.094003 | 1.15E-22 | 4.51E-22 |
| IFNB1    | 3.305391 | -3.63581 | 1.16E-22 | 4.56E-22 |
| LTB      | 2.168444 | 3.425821 | 1.19E-22 | 4.69E-22 |
| CD1A     | 2.939667 | 0.865947 | 1.26E-22 | 4.94E-22 |
| SHISA8   | 2.579922 | -2.09559 | 1.31E-22 | 5.13E-22 |
| KCNH2    | 2.326164 | 2.499384 | 1.61E-22 | 6.31E-22 |
| NBPF4    | 3.176276 | 1.160052 | 1.67E-22 | 6.53E-22 |
| USP41    | 2.634225 | -1.66256 | 1.82E-22 | 7.10E-22 |
| GDF9     | 2.963102 | 3.050188 | 1.96E-22 | 7.64E-22 |
| TMPRSS6  | 2.528068 | 3.170353 | 1.97E-22 | 7.66E-22 |
| CSAG3    | 5.611908 | -1.68687 | 1.98E-22 | 7.69E-22 |
| DYDC2    | 2.120505 | 0.202262 | 2.34E-22 | 9.07E-22 |
| SCRT1    | 3.109617 | -1.27773 | 2.34E-22 | 9.08E-22 |
| IFNL1    | 2.951012 | -2.46943 | 2.39E-22 | 9.25E-22 |
| SRD5A2   | 2.28078  | -0.28924 | 2.39E-22 | 9.25E-22 |
| AGR2     | 2.420016 | 9.205924 | 2.66E-22 | 1.03E-21 |
| HIST1H2B | 4.36557  | -2.48857 | 2.74E-22 | 1.06E-21 |
| KPNA7    | 2.041635 | -0.96397 | 2.83E-22 | 1.09E-21 |
| ELFN2    | 2.795125 | 0.650823 | 2.92E-22 | 1.13E-21 |
| C6orf222 | 3.50145  | -2.79799 | 3.17E-22 | 1.22E-21 |
| NPTX2    | 2.230443 | 2.13635  | 3.90E-22 | 1.50E-21 |
| MEIKIN   | 2.153924 | -3.78643 | 4.49E-22 | 1.72E-21 |
| NBPF6    | 3.109129 | 0.594006 | 5.32E-22 | 2.03E-21 |
| VIL1     | 3.530328 | -0.26603 | 5.69E-22 | 2.16E-21 |
| SCG2     | 2.808734 | 3.221998 | 5.71E-22 | 2.17E-21 |
| NKX2-2   | 5.540519 | 0.069299 | 6.47E-22 | 2.46E-21 |
| HSPB3    | -3.28518 | -2.14839 | 8.18E-22 | 3.10E-21 |
| KRT75    | 4.214006 | 0.92758  | 8.49E-22 | 3.21E-21 |
| SSTR2    | 2.05997  | 4.235463 | 9.89E-22 | 3.73E-21 |
| OTOR     | 3.073801 | -1.31205 | 1.00E-21 | 3.78E-21 |
| TMEM171  | 2.180591 | -0.80425 | 1.07E-21 | 4.03E-21 |
| PRSS2    | 4.476105 | 1.579496 | 1.10E-21 | 4.15E-21 |
| C1orf105 | 4.003383 | -1.23024 | 1.16E-21 | 4.37E-21 |
| TUBA3E   | 3.103228 | 0.937168 | 1.19E-21 | 4.47E-21 |
| IL12B    | 2.092998 | -1.48125 | 1.34E-21 | 5.04E-21 |
| F2       | 3.917945 | -1.9607  | 1.36E-21 | 5.10E-21 |
| PYY      | 2.699766 | 0.229092 | 1.41E-21 | 5.30E-21 |
| KIAA0319 | 2.423523 | 0.804536 | 1.59E-21 | 5.93E-21 |
| GNG4     | 2.802729 | 3.469876 | 1.74E-21 | 6.49E-21 |
| SPANXB1  | 6.912337 | -0.08819 | 1.88E-21 | 7.02E-21 |
| STMND1   | 2.364404 | 3.436819 | 2.12E-21 | 7.88E-21 |
| C4orf50  | 2.280679 | -2.33959 | 2.14E-21 | 7.96E-21 |
| SERPINC1 | 2.217398 | -0.98644 | 2.22E-21 | 8.24E-21 |
| SEZ6L    | 3.489366 | 3.414592 | 2.27E-21 | 8.42E-21 |
| ACSM2B   | -2.00742 | -3.22783 | 3.24E-21 | 1.20E-20 |
| MAGEA12  | 7.987066 | 0.87827  | 3.32E-21 | 1.22E-20 |
| POU3F2   | 4.084792 | -0.37005 | 3.84E-21 | 1.41E-20 |
| AC020636 | 3.102603 | -2.97132 | 3.87E-21 | 1.42E-20 |
| ZDHHC22  | 4.486436 | -0.48603 | 4.06E-21 | 1.49E-20 |

|          |          |          |          |          |
|----------|----------|----------|----------|----------|
| ERVV-2   | 5.122983 | -1.69067 | 4.08E-21 | 1.50E-20 |
| MSLN     | 3.897977 | 4.781067 | 4.94E-21 | 1.81E-20 |
| HIST2H3D | 2.321431 | -2.48601 | 5.01E-21 | 1.83E-20 |
| GATA4    | 5.129863 | 0.696995 | 5.12E-21 | 1.87E-20 |
| KRT1     | 5.505458 | 4.253401 | 5.37E-21 | 1.96E-20 |
| TNIP3    | 2.150626 | -0.2554  | 5.41E-21 | 1.98E-20 |
| SERPINA9 | 2.637578 | 0.170177 | 6.27E-21 | 2.29E-20 |
| SBK2     | 4.001367 | -1.96385 | 6.81E-21 | 2.48E-20 |
| A2ML1    | 3.476428 | 3.837956 | 7.22E-21 | 2.62E-20 |
| CACNA1B  | 2.598125 | 0.22087  | 7.56E-21 | 2.75E-20 |
| HIST1H4A | 4.211213 | -2.70321 | 7.75E-21 | 2.82E-20 |
| DLL3     | 2.754759 | -0.49224 | 8.08E-21 | 2.93E-20 |
| NUPR2    | 2.003222 | 1.996447 | 8.16E-21 | 2.96E-20 |
| LGALS9C  | 2.499236 | -0.89579 | 8.80E-21 | 3.19E-20 |
| SALL3    | 3.211463 | -2.14729 | 8.81E-21 | 3.19E-20 |
| WDR38    | 2.849409 | -1.3012  | 9.35E-21 | 3.38E-20 |
| CNGA2    | 5.351085 | -1.33191 | 9.66E-21 | 3.49E-20 |
| HORMAD   | 4.107243 | 1.868052 | 1.42E-20 | 5.10E-20 |
| GPR26    | 4.59229  | 2.328105 | 1.42E-20 | 5.11E-20 |
| TUBA4B   | 2.977835 | -1.16951 | 1.43E-20 | 5.13E-20 |
| LRG1     | 2.088164 | 5.608456 | 1.43E-20 | 5.14E-20 |
| DRC7     | 2.433599 | -1.58891 | 1.49E-20 | 5.35E-20 |
| SLC8A2   | 2.6245   | 0.860823 | 1.76E-20 | 6.31E-20 |
| S100A8   | 3.517055 | 6.227494 | 1.86E-20 | 6.64E-20 |
| PAX1     | 2.909405 | 0.068649 | 2.03E-20 | 7.26E-20 |
| CDH7     | 3.475974 | 1.028742 | 2.39E-20 | 8.50E-20 |
| AARD     | 2.162435 | 5.900518 | 2.41E-20 | 8.60E-20 |
| LHX1     | 5.878595 | 0.075297 | 2.73E-20 | 9.70E-20 |
| POTEC    | 5.84078  | 0.121562 | 2.87E-20 | 1.02E-19 |
| MGAT5B   | 2.15761  | 1.676849 | 3.29E-20 | 1.17E-19 |
| SLC1A1   | 2.276856 | 5.600478 | 3.47E-20 | 1.23E-19 |
| LGALS9B  | 2.79569  | -1.12535 | 3.91E-20 | 1.38E-19 |
| GPR158   | 2.398347 | 1.454555 | 4.00E-20 | 1.41E-19 |
| HIST1H2B | 4.077511 | -2.75715 | 4.07E-20 | 1.44E-19 |
| SBSN     | 4.635641 | 2.621577 | 4.16E-20 | 1.46E-19 |
| GAL      | 2.552343 | 1.809781 | 4.30E-20 | 1.51E-19 |
| FAM83A   | 2.853529 | 3.054543 | 4.56E-20 | 1.60E-19 |
| TMEM82   | 3.834389 | -2.28129 | 4.57E-20 | 1.61E-19 |
| RXFP3    | 2.019309 | -3.75032 | 4.78E-20 | 1.68E-19 |
| HMX2     | 4.474978 | -1.90723 | 5.09E-20 | 1.78E-19 |
| GCNT3    | 2.819057 | 0.709963 | 5.22E-20 | 1.83E-19 |
| ZP4      | 4.925001 | -2.7165  | 5.60E-20 | 1.96E-19 |
| FEZF2    | -2.60413 | -3.43683 | 5.96E-20 | 2.08E-19 |
| ALG1L    | 2.117265 | 1.136777 | 8.25E-20 | 2.86E-19 |
| HIST1H2A | 3.534823 | -2.0136  | 8.45E-20 | 2.93E-19 |
| NEU4     | 2.937268 | -0.11281 | 8.49E-20 | 2.94E-19 |
| MUC5B    | 2.863035 | 6.542556 | 1.16E-19 | 4.00E-19 |
| ASCL1    | 5.171426 | 2.57902  | 1.17E-19 | 4.02E-19 |
| INA      | 3.775532 | 0.526016 | 1.27E-19 | 4.38E-19 |
| NPHS1    | 2.639327 | -1.47264 | 1.28E-19 | 4.40E-19 |
| GABRA3   | 4.454342 | 0.168804 | 1.42E-19 | 4.89E-19 |
| FCRL4    | 2.322354 | -2.33375 | 1.45E-19 | 4.97E-19 |
| CDK5R2   | 4.839684 | -0.30833 | 1.63E-19 | 5.57E-19 |
| KRT2     | 3.385676 | -1.65022 | 1.75E-19 | 5.97E-19 |
| PGLYRP4  | 3.7892   | -0.86099 | 1.97E-19 | 6.72E-19 |
| MT1H     | 3.045625 | -0.74377 | 2.03E-19 | 6.93E-19 |
| ACOD1    | 3.028295 | -3.39035 | 2.04E-19 | 6.95E-19 |
| TLX2     | 2.07689  | -2.35881 | 2.11E-19 | 7.19E-19 |

|          |          |          |          |          |
|----------|----------|----------|----------|----------|
| EIF4E1B  | 4.395038 | -1.28835 | 2.50E-19 | 8.47E-19 |
| MUC19    | 4.01206  | 2.911984 | 2.51E-19 | 8.51E-19 |
| HIST2H2A | 2.596799 | -4.12969 | 2.56E-19 | 8.69E-19 |
| TFF3     | 2.589519 | 8.060259 | 2.59E-19 | 8.79E-19 |
| PCSK1N   | 2.923046 | 2.23258  | 2.63E-19 | 8.91E-19 |
| KCNF1    | 2.531694 | 3.144999 | 2.81E-19 | 9.52E-19 |
| IL17C    | 2.601466 | -3.05598 | 2.90E-19 | 9.82E-19 |
| NKAIN4   | 2.13402  | -1.23855 | 3.04E-19 | 1.03E-18 |
| VMO1     | 2.021107 | 1.976221 | 3.27E-19 | 1.10E-18 |
| BFSP2    | 2.067875 | -0.99708 | 3.32E-19 | 1.12E-18 |
| DYDC1    | 3.001654 | -3.14409 | 3.50E-19 | 1.18E-18 |
| LIN28A   | 5.27769  | 0.551149 | 3.68E-19 | 1.24E-18 |
| KRT3     | 3.172733 | -2.95661 | 3.79E-19 | 1.27E-18 |
| PEX5L    | 2.738748 | 2.443951 | 3.94E-19 | 1.32E-18 |
| PPBP     | -2.08398 | -2.8408  | 4.95E-19 | 1.65E-18 |
| CLEC6A   | 2.72161  | -2.53577 | 4.99E-19 | 1.67E-18 |
| TMPRSS4  | 2.879213 | 3.083811 | 6.62E-19 | 2.20E-18 |
| ZAN      | 2.322675 | -1.4154  | 6.90E-19 | 2.29E-18 |
| NIPAL4   | 2.209797 | 0.25041  | 7.28E-19 | 2.42E-18 |
| TEX14    | 2.008098 | 2.251181 | 8.00E-19 | 2.65E-18 |
| ZIC2     | 2.907226 | 1.277522 | 8.14E-19 | 2.70E-18 |
| ZBBX     | 2.92     | -1.48543 | 8.30E-19 | 2.75E-18 |
| TUBA3C   | 4.733129 | -1.6295  | 9.91E-19 | 3.27E-18 |
| HPDL     | 2.012354 | 1.398995 | 1.01E-18 | 3.32E-18 |
| CLEC3A   | 5.694597 | 7.750897 | 1.23E-18 | 4.05E-18 |
| PAX2     | 2.514491 | 1.017955 | 1.24E-18 | 4.06E-18 |
| ROBO2    | 2.693053 | 3.663858 | 1.50E-18 | 4.90E-18 |
| SNTN     | 2.74631  | -1.12489 | 1.50E-18 | 4.92E-18 |
| NAT16    | 3.293584 | -2.75795 | 1.53E-18 | 4.99E-18 |
| PGK2     | 3.405468 | -3.89883 | 1.83E-18 | 5.96E-18 |
| AGR3     | 2.358555 | 6.806769 | 2.13E-18 | 6.94E-18 |
| OTOG     | 3.962721 | -2.60626 | 2.19E-18 | 7.12E-18 |
| H3.Y     | 4.25287  | -3.18935 | 2.30E-18 | 7.48E-18 |
| C16orf92 | 2.249933 | -3.4221  | 2.50E-18 | 8.12E-18 |
| PAGE2    | 6.413692 | -0.4659  | 2.53E-18 | 8.20E-18 |
| TCL1B    | 4.871493 | -2.09002 | 2.54E-18 | 8.22E-18 |
| GABBR2   | 3.7426   | 1.403467 | 2.54E-18 | 8.22E-18 |
| ROS1     | 3.858113 | 0.453367 | 3.09E-18 | 9.98E-18 |
| NETO1    | 2.135079 | 0.165088 | 3.55E-18 | 1.14E-17 |
| LRR1Q4   | 2.105105 | -1.45528 | 3.85E-18 | 1.24E-17 |
| CYP2A7   | 5.227184 | 4.468245 | 3.90E-18 | 1.25E-17 |
| UTS2     | 2.119096 | -1.71317 | 4.00E-18 | 1.29E-17 |
| SIX3     | 3.017958 | 1.563237 | 4.33E-18 | 1.39E-17 |
| SHISA9   | 2.094737 | 3.129477 | 5.22E-18 | 1.67E-17 |
| DPYSL5   | 4.402219 | 1.087466 | 6.66E-18 | 2.12E-17 |
| MS4A8    | 3.241124 | 1.038018 | 7.33E-18 | 2.33E-17 |
| CSTL1    | 3.095144 | -3.04785 | 7.36E-18 | 2.34E-17 |
| CRP      | 6.287415 | 1.801064 | 7.76E-18 | 2.46E-17 |
| STXBP5L  | 2.73782  | -0.71253 | 7.80E-18 | 2.47E-17 |
| CREB3L3  | 3.236693 | -1.90861 | 9.78E-18 | 3.08E-17 |
| APOA2    | 6.333878 | 0.247018 | 9.92E-18 | 3.12E-17 |
| TMEM132  | 2.133977 | 0.707469 | 1.00E-17 | 3.15E-17 |
| PSORS1C2 | 3.416535 | 0.111613 | 1.02E-17 | 3.19E-17 |
| COL9A3   | 2.400374 | 4.017595 | 1.03E-17 | 3.23E-17 |
| GNGT1    | 4.629993 | -1.16421 | 1.11E-17 | 3.48E-17 |
| ASIC5    | 3.581193 | -3.72432 | 1.24E-17 | 3.88E-17 |
| SLC5A5   | 2.45624  | -0.21559 | 1.33E-17 | 4.16E-17 |
| SEZ6     | 3.650396 | 1.435464 | 1.43E-17 | 4.47E-17 |

|          |          |          |          |          |
|----------|----------|----------|----------|----------|
| AMER3    | 5.087837 | -0.7152  | 1.71E-17 | 5.31E-17 |
| S100A9   | 2.809466 | 7.468036 | 1.79E-17 | 5.58E-17 |
| MS4A6E   | -2.25069 | -2.64941 | 1.95E-17 | 6.06E-17 |
| MMP12    | 2.492569 | 2.819589 | 2.00E-17 | 6.20E-17 |
| CSAG2    | 4.601417 | -2.55463 | 2.02E-17 | 6.27E-17 |
| ASCL4    | 2.83397  | -1.8923  | 2.06E-17 | 6.38E-17 |
| CPLX2    | 6.388483 | 3.14647  | 2.11E-17 | 6.55E-17 |
| IGF2BP3  | 2.628388 | 0.198093 | 2.17E-17 | 6.72E-17 |
| FAM25A   | 4.282674 | -0.93148 | 2.20E-17 | 6.81E-17 |
| SLCO1B7  | -3.23058 | -2.05306 | 2.57E-17 | 7.94E-17 |
| MKRN3    | 2.853537 | 0.599842 | 2.73E-17 | 8.42E-17 |
| MALRD1   | 3.019641 | 2.731238 | 2.76E-17 | 8.52E-17 |
| VTN      | 2.434876 | 1.419602 | 2.86E-17 | 8.82E-17 |
| TCF24    | 3.096151 | -1.82738 | 3.29E-17 | 1.01E-16 |
| SHH      | 2.822906 | -1.1974  | 3.75E-17 | 1.15E-16 |
| PAQR9    | -2.35612 | -4.08613 | 3.97E-17 | 1.22E-16 |
| CPB1     | 4.777572 | 10.69362 | 4.04E-17 | 1.24E-16 |
| SLC1A6   | 4.065439 | 0.616088 | 4.13E-17 | 1.27E-16 |
| GATA5    | 3.672406 | 0.280166 | 4.21E-17 | 1.29E-16 |
| TGM3     | 2.306404 | 0.428361 | 4.33E-17 | 1.33E-16 |
| GABRA1   | 7.020894 | 0.214215 | 4.60E-17 | 1.41E-16 |
| SPTSSB   | 2.094368 | 4.81037  | 4.69E-17 | 1.43E-16 |
| LHX9     | 3.610431 | -1.34724 | 4.74E-17 | 1.45E-16 |
| SERPINA1 | 2.300442 | -0.13176 | 4.99E-17 | 1.52E-16 |
| TGM4     | 3.833274 | 0.476471 | 5.21E-17 | 1.59E-16 |
| COL6A5   | 2.507031 | -1.68279 | 5.29E-17 | 1.61E-16 |
| BPIFA2   | 5.224959 | -1.82281 | 5.65E-17 | 1.72E-16 |
| SOX2     | 3.320174 | 1.182208 | 6.25E-17 | 1.90E-16 |
| SMIM32   | 3.456711 | -2.48536 | 6.47E-17 | 1.96E-16 |
| GLDC     | 2.46495  | 2.992193 | 6.68E-17 | 2.02E-16 |
| FOXG1    | 4.237311 | -1.76126 | 6.74E-17 | 2.04E-16 |
| HUS1B    | 2.473014 | -0.80719 | 6.79E-17 | 2.05E-16 |
| AKAP14   | 3.099115 | -2.19508 | 7.36E-17 | 2.23E-16 |
| MAGEC2   | 6.632199 | 0.270483 | 7.46E-17 | 2.26E-16 |
| SLITRK6  | 2.5708   | 6.412535 | 7.88E-17 | 2.38E-16 |
| FMR1NB   | 4.707366 | -1.70811 | 8.43E-17 | 2.54E-16 |
| R3HDML   | 3.031807 | -3.38009 | 8.56E-17 | 2.58E-16 |
| C20orf85 | 5.485728 | 0.309577 | 8.67E-17 | 2.61E-16 |
| PCDH10   | 3.422698 | 3.393046 | 1.01E-16 | 3.04E-16 |
| BPIFB6   | 4.525964 | -2.52233 | 1.14E-16 | 3.42E-16 |
| SPIB     | 2.467704 | 2.641517 | 1.16E-16 | 3.47E-16 |
| MT3      | 2.710547 | -1.81198 | 1.18E-16 | 3.54E-16 |
| NELL1    | 4.510236 | 1.469    | 1.40E-16 | 4.19E-16 |
| LYPD8    | 2.715645 | -0.0261  | 1.47E-16 | 4.37E-16 |
| PAGE2B   | 4.297972 | -1.61386 | 1.57E-16 | 4.68E-16 |
| MAP3K19  | 2.123954 | -0.9378  | 1.76E-16 | 5.23E-16 |
| ACP7     | 2.722898 | -1.18277 | 1.80E-16 | 5.35E-16 |
| CXCL17   | 2.64979  | 4.771038 | 1.83E-16 | 5.44E-16 |
| TUBB4A   | 2.37797  | 0.977187 | 1.90E-16 | 5.65E-16 |
| UPK1A    | 2.651719 | 0.949297 | 2.16E-16 | 6.39E-16 |
| NCAN     | 4.715008 | 2.618954 | 2.26E-16 | 6.69E-16 |
| CSMD3    | 4.769214 | 1.27942  | 2.37E-16 | 7.01E-16 |
| ERVV-1   | 3.155763 | -2.0086  | 2.45E-16 | 7.23E-16 |
| IVL      | 4.032711 | 0.373809 | 2.56E-16 | 7.55E-16 |
| FADS6    | 3.189762 | -1.59707 | 2.57E-16 | 7.58E-16 |
| IDO1     | 2.050086 | 4.257881 | 2.73E-16 | 8.04E-16 |
| HTR1E    | 3.634567 | -2.47608 | 2.77E-16 | 8.16E-16 |
| COL2A1   | 3.346116 | 6.232455 | 2.83E-16 | 8.33E-16 |

|          |          |          |          |          |
|----------|----------|----------|----------|----------|
| CRISP3   | 4.00061  | 6.099751 | 3.46E-16 | 1.01E-15 |
| CCDC60   | 3.431419 | -1.18571 | 3.82E-16 | 1.12E-15 |
| MEPE     | 3.98478  | 0.106599 | 4.53E-16 | 1.32E-15 |
| CFAP65   | 2.072646 | 0.015974 | 4.53E-16 | 1.32E-15 |
| CDSN     | 2.710714 | -0.37473 | 4.89E-16 | 1.42E-15 |
| FAM135B  | 2.560724 | 1.699938 | 4.92E-16 | 1.43E-15 |
| CCKBR    | 4.028606 | 0.173572 | 5.31E-16 | 1.54E-15 |
| MAGEA3   | 7.572756 | 2.063555 | 5.44E-16 | 1.58E-15 |
| NTNG1    | 2.79352  | 2.247918 | 6.65E-16 | 1.92E-15 |
| PRMT8    | 2.587674 | -1.42636 | 6.92E-16 | 2.00E-15 |
| C1orf167 | 2.538542 | -0.88114 | 7.00E-16 | 2.02E-15 |
| REG4     | 2.403576 | -2.37502 | 7.32E-16 | 2.11E-15 |
| NFE4     | 4.288984 | 0.7631   | 8.46E-16 | 2.43E-15 |
| TPSG1    | 2.465678 | 1.904799 | 8.68E-16 | 2.49E-15 |
| PADI3    | 2.871546 | 1.462464 | 8.69E-16 | 2.50E-15 |
| LOR      | 5.38752  | 0.53909  | 1.09E-15 | 3.12E-15 |
| UCN3     | 9.005971 | 2.120453 | 1.14E-15 | 3.26E-15 |
| ADAMTS1  | 2.287075 | 1.223499 | 1.22E-15 | 3.48E-15 |
| ACTL6B   | 4.288509 | -1.00903 | 1.24E-15 | 3.55E-15 |
| NLRP7    | 2.370268 | -0.71987 | 1.25E-15 | 3.56E-15 |
| FTHL17   | 7.645274 | -1.13283 | 1.25E-15 | 3.58E-15 |
| KRT20    | 5.631552 | 1.132591 | 1.31E-15 | 3.74E-15 |
| COL9A1   | 3.685079 | 1.661324 | 1.37E-15 | 3.91E-15 |
| CCDC196  | 2.962036 | -0.38671 | 1.38E-15 | 3.92E-15 |
| APOBEC4  | 3.628047 | -2.33638 | 1.46E-15 | 4.15E-15 |
| TFF1     | 2.879235 | 7.680805 | 1.51E-15 | 4.29E-15 |
| EN1      | 2.217289 | 3.911541 | 1.66E-15 | 4.71E-15 |
| MUC13    | 3.072501 | 0.343766 | 1.76E-15 | 4.99E-15 |
| TMEM179  | 3.295988 | 0.579501 | 1.83E-15 | 5.19E-15 |
| SLC5A8   | 3.959737 | 3.429505 | 1.85E-15 | 5.24E-15 |
| SLC22A24 | 3.627102 | -3.28069 | 1.97E-15 | 5.56E-15 |
| SLC18A1  | 2.776561 | -1.42264 | 2.21E-15 | 6.24E-15 |
| COX7B2   | 6.462731 | -2.02304 | 2.22E-15 | 6.25E-15 |
| OLFM3    | 6.052916 | 0.550727 | 2.22E-15 | 6.28E-15 |
| ZFP42    | 4.903483 | 0.191324 | 2.41E-15 | 6.78E-15 |
| CHGB     | 4.766122 | 6.772895 | 2.41E-15 | 6.78E-15 |
| HYPM     | 2.718856 | -4.26014 | 2.70E-15 | 7.58E-15 |
| KCNG1    | 2.335049 | 2.518409 | 2.91E-15 | 8.17E-15 |
| CYP2F1   | 3.361605 | -1.88985 | 2.96E-15 | 8.31E-15 |
| KLHL1    | 7.607151 | 1.417001 | 3.09E-15 | 8.67E-15 |
| C4orf51  | 2.73067  | -2.44552 | 3.24E-15 | 9.07E-15 |
| PSCA     | 2.357395 | 3.635297 | 3.29E-15 | 9.22E-15 |
| NOTO     | -2.04946 | -3.47323 | 3.33E-15 | 9.33E-15 |
| TLX3     | 5.609601 | -1.88047 | 3.41E-15 | 9.56E-15 |
| SOHLH1   | 3.689673 | -1.95038 | 4.10E-15 | 1.14E-14 |
| GTSF1    | 2.02309  | 0.464135 | 4.31E-15 | 1.20E-14 |
| CTNNA2   | 3.223179 | 0.195509 | 4.33E-15 | 1.21E-14 |
| GRIA2    | 3.342337 | 4.568821 | 4.44E-15 | 1.24E-14 |
| ELAVL3   | 3.2612   | -0.75769 | 4.58E-15 | 1.27E-14 |
| CHGA     | 5.048874 | 6.269212 | 4.87E-15 | 1.36E-14 |
| NGB      | 2.959317 | -2.23827 | 4.96E-15 | 1.38E-14 |
| MUC5AC   | 4.653471 | 3.186652 | 4.97E-15 | 1.38E-14 |
| NXPH1    | 4.057558 | 2.903742 | 4.98E-15 | 1.38E-14 |
| OTP      | 2.490506 | -3.32185 | 5.40E-15 | 1.50E-14 |
| FAM216B  | 2.827581 | -2.3855  | 5.47E-15 | 1.52E-14 |
| HSD3B2   | 5.076903 | 0.981055 | 5.64E-15 | 1.56E-14 |
| STRA8    | 4.158305 | -1.36774 | 5.68E-15 | 1.57E-14 |
| GCGR     | 2.606849 | -2.34085 | 5.77E-15 | 1.60E-14 |

|          |          |          |          |          |
|----------|----------|----------|----------|----------|
| LRRC24   | 2.350393 | -4.26774 | 5.81E-15 | 1.61E-14 |
| GPR139   | 3.913221 | -1.25419 | 6.23E-15 | 1.72E-14 |
| CLRN1    | 2.679999 | -3.45068 | 6.34E-15 | 1.75E-14 |
| SLC38A8  | 2.692275 | -2.9166  | 6.44E-15 | 1.78E-14 |
| CYP2W1   | 2.537755 | -2.15751 | 6.84E-15 | 1.89E-14 |
| POTEJ    | 2.574199 | -1.71451 | 6.99E-15 | 1.93E-14 |
| CTXN2    | 2.062774 | -3.92033 | 7.70E-15 | 2.12E-14 |
| RIMS2    | 2.268399 | 2.148343 | 8.54E-15 | 2.34E-14 |
| SLIT1    | 2.401612 | 2.539083 | 1.02E-14 | 2.79E-14 |
| SLURP1   | 2.903519 | -0.59218 | 1.40E-14 | 3.80E-14 |
| PAH      | 2.356389 | 1.137361 | 1.41E-14 | 3.82E-14 |
| POTEI    | 2.07945  | -0.07983 | 1.46E-14 | 3.96E-14 |
| MAGEA8   | 2.584784 | -0.53969 | 1.65E-14 | 4.46E-14 |
| POU4F3   | 2.336178 | -2.01898 | 1.71E-14 | 4.62E-14 |
| ARL14    | 2.913111 | -2.89402 | 1.79E-14 | 4.82E-14 |
| PLA2G2F  | 2.672283 | -2.85881 | 2.01E-14 | 5.42E-14 |
| TCHHL1   | 5.288273 | -2.37026 | 2.08E-14 | 5.60E-14 |
| ASZ1     | 4.284757 | -3.18097 | 2.15E-14 | 5.78E-14 |
| TRIML2   | 2.612706 | -2.29887 | 2.50E-14 | 6.71E-14 |
| GPR22    | 2.675543 | -1.99642 | 2.54E-14 | 6.82E-14 |
| STAR     | 2.61577  | 1.553511 | 2.78E-14 | 7.43E-14 |
| LHX3     | 4.135084 | -3.59798 | 2.88E-14 | 7.70E-14 |
| GP2      | 2.670881 | 5.47303  | 2.95E-14 | 7.87E-14 |
| ISL2     | 2.448844 | -1.96917 | 3.46E-14 | 9.23E-14 |
| NDST4    | 4.68079  | 0.477367 | 3.49E-14 | 9.29E-14 |
| UNC93A   | 3.198061 | -2.92243 | 3.57E-14 | 9.52E-14 |
| HIST1H4L | 4.692559 | -3.47921 | 4.38E-14 | 1.16E-13 |
| BARX1    | 2.443575 | 0.900163 | 4.51E-14 | 1.20E-13 |
| CYP19A1  | 2.703434 | 2.141996 | 4.88E-14 | 1.29E-13 |
| TTR      | 3.619475 | -1.40158 | 4.95E-14 | 1.31E-13 |
| KNG1     | 3.478696 | -2.38725 | 5.04E-14 | 1.33E-13 |
| MLC1     | 2.400013 | 1.60491  | 5.05E-14 | 1.34E-13 |
| DMRT1    | 3.501493 | -1.98626 | 5.13E-14 | 1.36E-13 |
| MAGEA6   | 6.924947 | 1.88086  | 5.50E-14 | 1.45E-13 |
| PDX1     | 4.644547 | -2.82898 | 5.98E-14 | 1.58E-13 |
| MAGEC1   | 4.007498 | -0.30937 | 6.39E-14 | 1.68E-13 |
| DSPP     | 2.971151 | -3.58909 | 6.47E-14 | 1.70E-13 |
| NCCRP1   | 2.269842 | 4.023125 | 6.53E-14 | 1.72E-13 |
| TRIM67   | 2.270128 | 0.510452 | 6.77E-14 | 1.78E-13 |
| RAD21L1  | 3.475456 | -1.66801 | 6.90E-14 | 1.81E-13 |
| SYT9     | 2.039469 | 3.310923 | 6.97E-14 | 1.83E-13 |
| POU5F2   | 2.5975   | -1.36639 | 7.31E-14 | 1.92E-13 |
| RGS7     | 2.133928 | -0.5444  | 7.65E-14 | 2.00E-13 |
| ADGRF2   | 2.24806  | -2.68285 | 7.97E-14 | 2.08E-13 |
| TBX10    | 4.132265 | 0.33482  | 8.07E-14 | 2.11E-13 |
| ADAM18   | 4.080426 | -3.26651 | 8.45E-14 | 2.20E-13 |
| PAGE5    | 4.003078 | -1.51533 | 9.24E-14 | 2.41E-13 |
| VCX3A    | 5.169045 | -1.61113 | 1.02E-13 | 2.65E-13 |
| HTR3A    | 2.650079 | -0.63515 | 1.15E-13 | 2.97E-13 |
| HRH3     | 2.976999 | -1.88855 | 1.23E-13 | 3.19E-13 |
| KRTAP5-6 | 2.116098 | -4.29384 | 1.25E-13 | 3.22E-13 |
| CALY     | 2.106565 | -1.72963 | 1.25E-13 | 3.23E-13 |
| ZMAT4    | 2.132155 | 1.127246 | 1.27E-13 | 3.27E-13 |
| TRPM8    | 2.605224 | 0.655984 | 1.29E-13 | 3.32E-13 |
| PRSS1    | 3.727081 | 0.036466 | 1.30E-13 | 3.36E-13 |
| S100G    | 4.693831 | 1.037914 | 1.36E-13 | 3.49E-13 |
| CALML5   | 2.64592  | 6.308589 | 1.36E-13 | 3.51E-13 |
| PGLYRP2  | 2.196118 | 2.983816 | 1.40E-13 | 3.60E-13 |

|          |          |          |          |          |
|----------|----------|----------|----------|----------|
| COL11A2  | 2.256262 | 3.110764 | 1.50E-13 | 3.86E-13 |
| APCS     | 7.412083 | -1.40312 | 1.54E-13 | 3.96E-13 |
| HIST1H3A | 2.026295 | -2.20963 | 1.60E-13 | 4.11E-13 |
| DMRTA2   | 3.01959  | -1.98405 | 1.61E-13 | 4.13E-13 |
| KIRREL2  | 2.171386 | -0.50503 | 1.69E-13 | 4.34E-13 |
| HIST2H2A | 2.135648 | -4.25092 | 1.86E-13 | 4.75E-13 |
| KRT34    | 4.335308 | -2.68235 | 1.88E-13 | 4.80E-13 |
| PADI1    | 2.184696 | -2.02051 | 2.08E-13 | 5.31E-13 |
| IGSF23   | 2.304379 | -2.09111 | 2.19E-13 | 5.59E-13 |
| FOXA3    | 2.211138 | 0.265902 | 2.27E-13 | 5.77E-13 |
| CNGA3    | 2.163246 | 0.159172 | 2.47E-13 | 6.27E-13 |
| SLC24A5  | 2.032393 | -4.13187 | 2.56E-13 | 6.50E-13 |
| ANKRD30  | 2.217259 | 3.588833 | 2.67E-13 | 6.76E-13 |
| NPBWR1   | 2.967368 | -2.78864 | 2.69E-13 | 6.82E-13 |
| CYP2A6   | 3.536676 | 5.695062 | 2.81E-13 | 7.10E-13 |
| CACNG2   | -2.26019 | -3.01344 | 3.61E-13 | 9.10E-13 |
| DKK1     | 2.14426  | 2.712381 | 4.13E-13 | 1.04E-12 |
| IL36RN   | 3.025996 | -1.73122 | 4.23E-13 | 1.06E-12 |
| GFY      | 3.150413 | -2.43775 | 4.36E-13 | 1.09E-12 |
| CEACAM7  | 2.003051 | 0.153455 | 4.67E-13 | 1.17E-12 |
| AMTN     | 3.577931 | 0.073659 | 4.92E-13 | 1.23E-12 |
| CRCT1    | 5.821635 | -1.95702 | 5.26E-13 | 1.31E-12 |
| TBR1     | 3.00858  | -2.12992 | 5.93E-13 | 1.48E-12 |
| CRISP1   | 3.323813 | -2.78915 | 6.06E-13 | 1.51E-12 |
| PIH1D3   | 2.329767 | -3.12612 | 6.15E-13 | 1.53E-12 |
| MAGEA10  | 5.428436 | -0.63997 | 6.21E-13 | 1.55E-12 |
| KRTDAP   | 3.355431 | 1.586462 | 6.67E-13 | 1.66E-12 |
| GAGE2A   | 6.026063 | -2.60079 | 6.98E-13 | 1.73E-12 |
| ITLN2    | 3.098587 | -2.81992 | 7.41E-13 | 1.84E-12 |
| OR1F1    | 3.494489 | -3.60842 | 7.68E-13 | 1.91E-12 |
| VSTM2A   | 4.002446 | 4.666452 | 8.53E-13 | 2.11E-12 |
| LRR31    | 2.386133 | 2.658406 | 8.84E-13 | 2.18E-12 |
| PBOV1    | 2.25284  | -2.51959 | 8.96E-13 | 2.21E-12 |
| GIP      | 3.308002 | -3.25361 | 9.45E-13 | 2.33E-12 |
| C2CD4A   | 2.228979 | 2.491388 | 9.96E-13 | 2.46E-12 |
| PAGE1    | 6.780474 | -1.08798 | 9.98E-13 | 2.46E-12 |
| KCNJ4    | 2.866197 | -3.0156  | 1.04E-12 | 2.56E-12 |
| SP7      | 3.238022 | -0.83529 | 1.04E-12 | 2.56E-12 |
| GPR52    | 2.574934 | -3.38217 | 1.06E-12 | 2.60E-12 |
| PRR20G   | 3.073396 | -4.23243 | 1.07E-12 | 2.63E-12 |
| MAGEA11  | 3.552333 | -1.48503 | 1.07E-12 | 2.64E-12 |
| FIBCD1   | 2.006529 | 1.782798 | 1.08E-12 | 2.66E-12 |
| CDHR4    | 2.26701  | -0.38062 | 1.12E-12 | 2.76E-12 |
| SLC4A10  | 2.414247 | 1.161986 | 1.15E-12 | 2.82E-12 |
| C10orf82 | 2.207663 | 2.446818 | 1.18E-12 | 2.90E-12 |
| INS      | 5.859367 | -2.37369 | 1.27E-12 | 3.11E-12 |
| BEX1     | 2.809056 | 3.763268 | 1.33E-12 | 3.25E-12 |
| KRT35    | 3.576523 | -2.51073 | 1.35E-12 | 3.31E-12 |
| DCAF8L2  | 4.533231 | -3.01323 | 1.42E-12 | 3.46E-12 |
| HIST1H1A | 3.798226 | -3.28943 | 1.44E-12 | 3.52E-12 |
| ZIC1     | 2.427044 | 2.06606  | 1.49E-12 | 3.64E-12 |
| FAM163B  | 2.594739 | -3.12105 | 1.61E-12 | 3.93E-12 |
| SVOP     | 3.387629 | -1.19317 | 1.79E-12 | 4.36E-12 |
| IFITM5   | 3.479247 | -1.15535 | 1.81E-12 | 4.38E-12 |
| NTSR1    | 2.012504 | -1.03623 | 1.98E-12 | 4.80E-12 |
| AC011604 | -2.75024 | -1.53121 | 2.27E-12 | 5.49E-12 |
| SSX1     | 5.885391 | -0.60387 | 2.29E-12 | 5.55E-12 |
| LRR53    | 4.818991 | -1.08274 | 2.45E-12 | 5.91E-12 |

|          |          |          |          |          |
|----------|----------|----------|----------|----------|
| LCE2B    | 5.814375 | -2.83675 | 2.81E-12 | 6.75E-12 |
| TRIM15   | 2.811346 | -2.74485 | 2.91E-12 | 6.98E-12 |
| PDCL2    | 3.647896 | -3.92555 | 3.01E-12 | 7.22E-12 |
| VCX      | 3.392676 | -2.23075 | 3.10E-12 | 7.42E-12 |
| CT45A10  | 5.1349   | -2.93127 | 3.11E-12 | 7.44E-12 |
| CDH18    | 3.198467 | -0.57428 | 3.12E-12 | 7.48E-12 |
| MC5R     | 2.546246 | -2.87253 | 3.21E-12 | 7.69E-12 |
| GAGE1    | 5.512411 | -2.7929  | 3.30E-12 | 7.89E-12 |
| PNMT     | 2.522638 | 3.498194 | 3.46E-12 | 8.26E-12 |
| PRR27    | 6.120527 | 1.279484 | 4.04E-12 | 9.64E-12 |
| CYP2A13  | 3.402202 | -1.18863 | 4.15E-12 | 9.88E-12 |
| RNF113B  | 2.7134   | -3.38561 | 4.26E-12 | 1.01E-11 |
| LPO      | 2.017796 | -0.29948 | 4.30E-12 | 1.02E-11 |
| LYZL2    | 2.610795 | -2.58139 | 4.34E-12 | 1.03E-11 |
| SCN1A    | 3.307345 | 0.006615 | 4.75E-12 | 1.13E-11 |
| UGT2B4   | 3.835731 | 3.018688 | 4.79E-12 | 1.14E-11 |
| TM4SF5   | 4.309389 | -3.05573 | 4.97E-12 | 1.18E-11 |
| TEKT1    | 2.1638   | -0.69256 | 5.15E-12 | 1.22E-11 |
| B4GALNT2 | 2.354786 | 2.405301 | 5.16E-12 | 1.22E-11 |
| C12orf56 | 2.321232 | -1.19798 | 5.26E-12 | 1.25E-11 |
| PGLYRP3  | 3.971367 | -2.26747 | 5.42E-12 | 1.28E-11 |
| MAGEA4   | 5.81752  | 2.118444 | 5.51E-12 | 1.30E-11 |
| SULT1C3  | -3.19567 | 2.182721 | 5.51E-12 | 1.30E-11 |
| CARTPT   | 6.840315 | 7.056428 | 5.97E-12 | 1.41E-11 |
| TACR3    | 2.161607 | -2.14563 | 6.37E-12 | 1.50E-11 |
| DLX6     | 2.36817  | -0.45346 | 6.49E-12 | 1.53E-11 |
| ALPP     | 3.387925 | -3.02256 | 6.72E-12 | 1.58E-11 |
| NEUROD1  | 5.859171 | -1.63518 | 7.07E-12 | 1.66E-11 |
| SYT14    | 2.089277 | -0.17636 | 7.21E-12 | 1.69E-11 |
| CST9L    | 3.119166 | -1.22455 | 7.65E-12 | 1.79E-11 |
| LCE1B    | 5.370817 | -2.66133 | 8.46E-12 | 1.98E-11 |
| GABRG2   | 5.420925 | -0.39143 | 8.85E-12 | 2.07E-11 |
| CROCC2   | 2.103704 | -1.00284 | 8.99E-12 | 2.10E-11 |
| IAPP     | 6.682913 | -0.95855 | 1.02E-11 | 2.39E-11 |
| SFTPA1   | -2.06951 | -1.7364  | 1.12E-11 | 2.60E-11 |
| BPIFB4   | 3.534434 | -1.61249 | 1.14E-11 | 2.65E-11 |
| C7orf33  | 3.303528 | -3.83951 | 1.15E-11 | 2.67E-11 |
| POU4F1   | 3.227035 | -1.07279 | 1.17E-11 | 2.71E-11 |
| IL21     | 2.34446  | -3.77376 | 1.24E-11 | 2.88E-11 |
| VWC2L    | 2.699952 | -2.69309 | 1.26E-11 | 2.93E-11 |
| HDC      | 2.174354 | 3.557256 | 1.32E-11 | 3.05E-11 |
| LHFPL4   | 2.517206 | -0.3115  | 1.47E-11 | 3.38E-11 |
| LCE1A    | 5.525357 | -2.97482 | 1.49E-11 | 3.44E-11 |
| PNMA5    | 2.681739 | -0.63307 | 1.68E-11 | 3.88E-11 |
| ATP2B3   | 2.314538 | -2.04057 | 1.69E-11 | 3.89E-11 |
| DCD      | 5.149144 | 6.371972 | 2.03E-11 | 4.64E-11 |
| PSG9     | 3.019244 | -1.70787 | 2.03E-11 | 4.66E-11 |
| PRSS33   | 3.850578 | 0.861833 | 2.05E-11 | 4.70E-11 |
| PRDM13   | 3.94361  | -2.2641  | 2.07E-11 | 4.73E-11 |
| SSTR5    | 3.002245 | -2.8044  | 2.11E-11 | 4.83E-11 |
| RAX      | 2.45613  | -3.87392 | 2.20E-11 | 5.04E-11 |
| HIST2H3C | 3.651183 | -3.60699 | 2.32E-11 | 5.31E-11 |
| SPAG6    | 2.457988 | 2.657178 | 2.40E-11 | 5.48E-11 |
| DLX2     | 2.123559 | 1.749633 | 2.61E-11 | 5.94E-11 |
| DCAF4L2  | 5.516693 | -1.41917 | 2.67E-11 | 6.08E-11 |
| CACNG5   | 2.469173 | -4.20725 | 2.68E-11 | 6.10E-11 |
| GHSR     | 4.238559 | -2.95521 | 2.97E-11 | 6.74E-11 |
| TAAR6    | 4.65592  | -3.71928 | 3.01E-11 | 6.83E-11 |

|           |          |          |          |          |
|-----------|----------|----------|----------|----------|
| WNT7A     | 2.257825 | -2.10387 | 3.09E-11 | 7.01E-11 |
| KRT81     | 2.387085 | 6.369136 | 3.14E-11 | 7.11E-11 |
| S100A7A   | 4.574777 | 3.249895 | 3.43E-11 | 7.75E-11 |
| SPRR2F    | -2.07911 | -3.29481 | 3.43E-11 | 7.76E-11 |
| REG1A     | 5.886154 | -1.4178  | 3.58E-11 | 8.09E-11 |
| CSH2      | 3.816928 | -3.90937 | 3.70E-11 | 8.35E-11 |
| C11orf86  | 3.484172 | -1.0921  | 3.91E-11 | 8.82E-11 |
| KRTAP3-1  | 2.402976 | -3.25769 | 3.91E-11 | 8.82E-11 |
| C1orf68   | 5.283632 | -2.78491 | 4.19E-11 | 9.44E-11 |
| SPERT     | 2.420584 | -2.1319  | 4.25E-11 | 9.56E-11 |
| CHRNA4    | 2.929472 | -1.50873 | 4.26E-11 | 9.57E-11 |
| LYPD4     | 2.623047 | -2.6736  | 4.39E-11 | 9.87E-11 |
| CXorf67   | 3.541778 | -1.48905 | 4.82E-11 | 1.08E-10 |
| VAX1      | 3.78344  | -1.92864 | 4.89E-11 | 1.10E-10 |
| ZFR2      | 2.08733  | -0.43108 | 4.93E-11 | 1.10E-10 |
| CT45A1    | 5.70252  | -2.27844 | 4.99E-11 | 1.12E-10 |
| EBLN1     | 3.37661  | -2.84698 | 5.13E-11 | 1.15E-10 |
| TEX15     | 3.296126 | -0.95865 | 5.47E-11 | 1.22E-10 |
| GSTA3     | 2.693071 | -0.87361 | 5.50E-11 | 1.23E-10 |
| ZIC3      | 3.095025 | -2.42921 | 5.82E-11 | 1.30E-10 |
| FCAMR     | 2.401702 | -1.07947 | 6.27E-11 | 1.40E-10 |
| ALPI      | 3.874795 | -3.63273 | 6.28E-11 | 1.40E-10 |
| SPO11     | 4.043066 | -3.85473 | 6.47E-11 | 1.44E-10 |
| FAM71C    | 2.148085 | -3.15332 | 6.78E-11 | 1.51E-10 |
| HIST1H4F  | 3.624329 | -3.52883 | 6.88E-11 | 1.53E-10 |
| NKX2-5    | 2.896664 | 0.043552 | 7.08E-11 | 1.57E-10 |
| BPIFA1    | 5.857075 | 1.744849 | 7.58E-11 | 1.68E-10 |
| LCE1F     | 4.907549 | -3.4222  | 8.42E-11 | 1.86E-10 |
| WFDC13    | 2.11373  | -3.02324 | 8.51E-11 | 1.88E-10 |
| UGT2B28   | -2.06404 | 2.811023 | 8.77E-11 | 1.94E-10 |
| FGF3      | 3.26457  | -3.3092  | 1.01E-10 | 2.22E-10 |
| NKX2-3    | 3.134025 | -2.44309 | 1.04E-10 | 2.30E-10 |
| DMRTC2    | 2.626347 | -1.31377 | 1.05E-10 | 2.31E-10 |
| C10orf113 | 2.458834 | -2.87351 | 1.13E-10 | 2.49E-10 |
| CFC1      | 3.664233 | -4.01161 | 1.15E-10 | 2.52E-10 |
| HTN1      | 5.763218 | -1.09217 | 1.20E-10 | 2.63E-10 |
| APOC3     | 5.035754 | -1.17757 | 1.47E-10 | 3.22E-10 |
| SLC5A12   | 2.251014 | -0.84009 | 1.63E-10 | 3.54E-10 |
| ZIC5      | 3.020001 | -0.68062 | 1.71E-10 | 3.73E-10 |
| KNCN      | 2.697199 | -4.12294 | 1.98E-10 | 4.29E-10 |
| SP8       | 3.744022 | -3.43186 | 2.05E-10 | 4.46E-10 |
| IRS4      | 3.780069 | 1.485725 | 2.14E-10 | 4.63E-10 |
| F13B      | 2.195475 | -4.24987 | 2.20E-10 | 4.76E-10 |
| TEX13B    | 2.62567  | -4.05966 | 2.66E-10 | 5.74E-10 |
| C6orf118  | 2.467202 | -2.55866 | 2.69E-10 | 5.81E-10 |
| LIN28B    | 4.222221 | -2.19413 | 2.71E-10 | 5.85E-10 |
| PNLIP     | 3.659868 | -3.46276 | 2.73E-10 | 5.87E-10 |
| KRT31     | 2.311958 | 0.047559 | 2.78E-10 | 5.99E-10 |
| C1orf158  | 2.406968 | -2.31442 | 2.98E-10 | 6.42E-10 |
| NEUROD4   | 5.247797 | -2.14318 | 3.02E-10 | 6.50E-10 |
| LCE2C     | 4.871353 | -3.3903  | 3.05E-10 | 6.56E-10 |
| LCE2D     | 4.439109 | -3.69979 | 3.30E-10 | 7.07E-10 |
| KRT24     | 2.878527 | -0.31601 | 3.32E-10 | 7.12E-10 |
| FAM9C     | 3.262892 | -0.42475 | 3.47E-10 | 7.44E-10 |
| SLC15A1   | 2.215577 | 1.569582 | 3.57E-10 | 7.64E-10 |
| CCDC172   | 4.963663 | -2.4776  | 3.57E-10 | 7.65E-10 |
| TAS2R30   | 2.421413 | -2.32766 | 3.57E-10 | 7.65E-10 |
| KLK12     | 3.119531 | 1.51658  | 3.58E-10 | 7.66E-10 |

|          |          |          |          |          |
|----------|----------|----------|----------|----------|
| CNMD     | 3.218509 | 0.08786  | 3.70E-10 | 7.90E-10 |
| MAGEB16  | 4.320112 | -3.3023  | 3.70E-10 | 7.90E-10 |
| AHSG     | 3.6493   | -2.61376 | 3.85E-10 | 8.22E-10 |
| NR5A1    | 2.88411  | -1.04318 | 4.07E-10 | 8.68E-10 |
| PNMA6E   | 4.518933 | -2.61358 | 4.41E-10 | 9.38E-10 |
| RTP3     | 3.654448 | -1.88889 | 5.03E-10 | 1.07E-09 |
| RAET1L   | 2.014953 | -0.57739 | 5.13E-10 | 1.09E-09 |
| CLEC2A   | 2.97965  | -4.03748 | 5.51E-10 | 1.17E-09 |
| EDDM3B   | 2.444454 | -1.3011  | 5.57E-10 | 1.18E-09 |
| ECEL1    | 2.071967 | 3.23265  | 5.67E-10 | 1.20E-09 |
| FGF4     | 5.97416  | 0.310487 | 5.89E-10 | 1.25E-09 |
| SLC17A8  | 2.35774  | -2.52645 | 6.20E-10 | 1.31E-09 |
| PLG      | 2.796516 | -2.74322 | 6.91E-10 | 1.46E-09 |
| FEZF1    | 2.472607 | -3.00263 | 7.12E-10 | 1.50E-09 |
| SORCS3   | 2.156078 | -1.15952 | 7.33E-10 | 1.54E-09 |
| KPRP     | 4.56888  | -2.33943 | 7.59E-10 | 1.60E-09 |
| SERPINB4 | 4.240262 | 0.606253 | 7.66E-10 | 1.61E-09 |
| GNAT3    | 4.960642 | -0.1627  | 7.70E-10 | 1.62E-09 |
| CLVS2    | 3.354696 | 0.995887 | 8.30E-10 | 1.74E-09 |
| APOA5    | 2.17815  | -3.27876 | 8.44E-10 | 1.77E-09 |
| C7orf77  | 2.316846 | -3.68752 | 8.67E-10 | 1.82E-09 |
| NEUROD2  | 2.32313  | -1.00027 | 8.82E-10 | 1.85E-09 |
| WDR72    | 2.166225 | 2.491035 | 9.11E-10 | 1.91E-09 |
| KRTAP17- | 2.311936 | -3.73661 | 9.36E-10 | 1.96E-09 |
| CPA6     | 2.025142 | 1.786509 | 9.36E-10 | 1.96E-09 |
| VRTN     | 3.351867 | -1.95705 | 9.56E-10 | 2.00E-09 |
| FGF21    | 3.44715  | -3.06474 | 9.86E-10 | 2.06E-09 |
| ZG16     | 2.304809 | -2.38828 | 9.95E-10 | 2.08E-09 |
| PRSS41   | 3.575717 | -1.95043 | 1.02E-09 | 2.12E-09 |
| PRR35    | 2.062252 | -3.914   | 1.02E-09 | 2.12E-09 |
| TPH2     | 2.257108 | -3.15681 | 1.03E-09 | 2.15E-09 |
| OLIG2    | 2.481141 | -3.49148 | 1.07E-09 | 2.24E-09 |
| OR56A3   | 3.686634 | -2.95139 | 1.22E-09 | 2.52E-09 |
| CFHR4    | 3.194332 | -3.3929  | 1.32E-09 | 2.72E-09 |
| NEUROG3  | 2.440462 | -2.22321 | 1.34E-09 | 2.78E-09 |
| GCG      | 5.093261 | -2.12637 | 1.39E-09 | 2.86E-09 |
| SCRT2    | 3.397136 | -3.57825 | 1.40E-09 | 2.89E-09 |
| DEFB126  | 3.561161 | -3.62355 | 1.45E-09 | 2.98E-09 |
| C8A      | 4.272929 | -2.93231 | 1.46E-09 | 3.00E-09 |
| GSTA2    | 2.234463 | -1.28932 | 1.48E-09 | 3.05E-09 |
| WFDC6    | 2.276946 | -0.92915 | 1.81E-09 | 3.71E-09 |
| MAB21L2  | 2.202982 | -1.64804 | 1.87E-09 | 3.83E-09 |
| WFDC10A  | 2.685885 | -3.93285 | 2.06E-09 | 4.21E-09 |
| APOBEC1  | 2.551192 | -4.13261 | 2.06E-09 | 4.22E-09 |
| CT83     | 4.690297 | 0.407635 | 2.10E-09 | 4.30E-09 |
| HS3ST6   | 2.231256 | -1.13722 | 2.16E-09 | 4.41E-09 |
| PAX7     | 3.090412 | 1.601566 | 2.50E-09 | 5.10E-09 |
| CCDC175  | 2.0182   | -2.81547 | 2.55E-09 | 5.20E-09 |
| FGG      | 3.737674 | 4.025224 | 2.65E-09 | 5.38E-09 |
| GC       | 5.024375 | -1.42788 | 2.70E-09 | 5.48E-09 |
| TBX20    | 2.315971 | -1.54802 | 2.85E-09 | 5.78E-09 |
| ZNF716   | 3.058969 | -2.43609 | 3.32E-09 | 6.70E-09 |
| BRINP3   | 3.079987 | 3.41945  | 3.40E-09 | 6.86E-09 |
| ZNF280A  | 2.547133 | -3.03238 | 3.57E-09 | 7.20E-09 |
| PCSK2    | 2.886928 | 1.472222 | 3.73E-09 | 7.51E-09 |
| GPR6     | 2.802823 | -2.63695 | 3.80E-09 | 7.66E-09 |
| MAGEB2   | 3.603251 | -1.44152 | 3.97E-09 | 7.98E-09 |
| S100A7   | 3.054471 | 5.924361 | 4.00E-09 | 8.05E-09 |

|          |          |          |          |          |
|----------|----------|----------|----------|----------|
| TAGLN3   | 2.258155 | -1.46013 | 4.05E-09 | 8.13E-09 |
| LCE2A    | 3.579979 | -4.12883 | 4.52E-09 | 9.06E-09 |
| SYT4     | 4.22055  | 1.026118 | 4.79E-09 | 9.59E-09 |
| OLIG1    | 2.13041  | -1.09533 | 4.91E-09 | 9.82E-09 |
| MOG      | 2.620293 | -1.23428 | 4.98E-09 | 9.96E-09 |
| XAGE2    | 4.287615 | -0.21577 | 5.04E-09 | 1.01E-08 |
| LHX5     | 2.325732 | -3.07223 | 5.85E-09 | 1.16E-08 |
| HMX3     | 2.69134  | -2.66943 | 5.94E-09 | 1.18E-08 |
| SLITRK1  | 2.724323 | 0.198155 | 6.65E-09 | 1.32E-08 |
| FGL1     | 2.455858 | 1.34951  | 6.84E-09 | 1.36E-08 |
| UGT2A1   | 3.823858 | -3.13745 | 6.85E-09 | 1.36E-08 |
| SLC18A3  | 3.647598 | -3.58764 | 7.33E-09 | 1.45E-08 |
| AMELX    | 3.935246 | -3.43702 | 7.45E-09 | 1.47E-08 |
| FSTL5    | 2.689426 | -1.81677 | 8.18E-09 | 1.61E-08 |
| KRT38    | 2.559077 | -3.48221 | 8.19E-09 | 1.61E-08 |
| AMER2    | 2.742757 | -0.92659 | 8.20E-09 | 1.62E-08 |
| KRTAP9-4 | 3.703001 | -4.04538 | 8.53E-09 | 1.68E-08 |
| CAMKV    | 2.08236  | -1.29712 | 9.62E-09 | 1.89E-08 |
| OCSTAMF  | 2.06251  | -3.16288 | 1.02E-08 | 1.99E-08 |
| KLK14    | 2.037884 | 3.211837 | 1.05E-08 | 2.05E-08 |
| SOX3     | 2.551795 | -2.6768  | 1.06E-08 | 2.08E-08 |
| SEMG2    | 3.890944 | -2.8878  | 1.08E-08 | 2.11E-08 |
| SLC6A19  | 2.161671 | -4.18282 | 1.09E-08 | 2.14E-08 |
| CTSE     | 2.24635  | -0.28556 | 1.12E-08 | 2.19E-08 |
| C9       | 2.455511 | -2.07965 | 1.13E-08 | 2.21E-08 |
| HAO1     | 3.32886  | -2.13388 | 1.14E-08 | 2.22E-08 |
| NPY      | 3.379172 | -0.79489 | 1.17E-08 | 2.28E-08 |
| KRTAP21- | 2.571928 | -4.23904 | 1.17E-08 | 2.29E-08 |
| LY6L     | 4.009446 | -3.10507 | 1.18E-08 | 2.30E-08 |
| OR4B1    | 3.701458 | -4.13754 | 1.18E-08 | 2.31E-08 |
| ANKRD66  | 2.175563 | -3.35044 | 1.22E-08 | 2.38E-08 |
| AQP12B   | 2.962718 | -4.21632 | 1.24E-08 | 2.41E-08 |
| MYT1L    | 2.103189 | -1.90009 | 1.24E-08 | 2.41E-08 |
| CCDC198  | 2.337703 | -3.38272 | 1.24E-08 | 2.42E-08 |
| AMY2A    | 2.79267  | -2.28963 | 1.30E-08 | 2.53E-08 |
| TGIF2LX  | 3.167323 | -4.15442 | 1.42E-08 | 2.75E-08 |
| CNTN5    | 2.091865 | -0.57702 | 1.85E-08 | 3.57E-08 |
| KRTAP4-1 | 3.225108 | -3.66068 | 1.87E-08 | 3.60E-08 |
| RTL1     | 3.045205 | -1.61228 | 1.87E-08 | 3.61E-08 |
| KCNQ2    | 2.104757 | -0.84198 | 2.11E-08 | 4.05E-08 |
| CST9     | 2.581039 | 3.867071 | 2.16E-08 | 4.15E-08 |
| KCNK16   | 2.941388 | -3.07611 | 2.23E-08 | 4.28E-08 |
| RHCG     | 2.003424 | 2.378709 | 2.31E-08 | 4.43E-08 |
| BPIFB3   | 4.351127 | -2.87758 | 2.36E-08 | 4.52E-08 |
| PRB1     | 3.345022 | -3.82842 | 2.38E-08 | 4.55E-08 |
| CA10     | 2.91848  | -0.72219 | 2.38E-08 | 4.56E-08 |
| PHGR1    | 2.015522 | 1.159161 | 2.57E-08 | 4.92E-08 |
| MAGEA9   | 3.482737 | -4.02184 | 2.60E-08 | 4.96E-08 |
| LCE3D    | 3.844376 | -3.63821 | 2.61E-08 | 4.99E-08 |
| C3orf30  | 2.331036 | -4.1429  | 2.67E-08 | 5.10E-08 |
| SMR3B    | 4.830464 | 5.659485 | 2.69E-08 | 5.13E-08 |
| GABRR3   | 2.247062 | -3.62197 | 2.75E-08 | 5.24E-08 |
| BPIFB2   | 2.060969 | 4.448768 | 2.79E-08 | 5.31E-08 |
| GHRH     | 2.286762 | -0.72718 | 2.80E-08 | 5.34E-08 |
| FDCSP    | 2.602188 | 7.436402 | 2.84E-08 | 5.40E-08 |
| TPTE     | 3.279638 | -3.87027 | 2.96E-08 | 5.63E-08 |
| ELSPBP1  | 2.912814 | -4.12609 | 3.11E-08 | 5.92E-08 |
| PSAPL1   | 3.797654 | -1.0496  | 3.33E-08 | 6.32E-08 |

|          |          |          |          |          |
|----------|----------|----------|----------|----------|
| DEFB4A   | 3.561148 | -3.997   | 3.40E-08 | 6.45E-08 |
| LCE6A    | 4.056468 | -3.68221 | 3.53E-08 | 6.69E-08 |
| KRT6A    | 2.332192 | 5.372303 | 3.72E-08 | 7.04E-08 |
| LCE1D    | 3.712851 | -3.98352 | 3.93E-08 | 7.41E-08 |
| SCGB1D4  | 3.509763 | -3.27259 | 3.99E-08 | 7.54E-08 |
| SSX3     | 3.886029 | -3.32712 | 4.62E-08 | 8.69E-08 |
| EFCAB3   | 2.399186 | -3.1718  | 4.91E-08 | 9.20E-08 |
| OR52E8   | 2.273306 | -4.00368 | 5.98E-08 | 1.12E-07 |
| LCE5A    | 3.006936 | -3.69617 | 5.99E-08 | 1.12E-07 |
| APOH     | 3.918337 | -1.90804 | 6.22E-08 | 1.16E-07 |
| KCNJ18   | 2.719611 | -3.68455 | 6.28E-08 | 1.17E-07 |
| DPPA2    | 3.445551 | -3.7518  | 6.55E-08 | 1.22E-07 |
| DDX53    | 3.134306 | -3.37316 | 6.82E-08 | 1.27E-07 |
| SPANXC   | 3.481813 | -3.08947 | 7.02E-08 | 1.30E-07 |
| SPACA7   | 2.666876 | -4.2686  | 7.89E-08 | 1.46E-07 |
| CRNN     | 3.878423 | -2.07494 | 8.07E-08 | 1.49E-07 |
| FGF23    | 3.314003 | -3.39646 | 8.32E-08 | 1.54E-07 |
| LRTM1    | 2.321523 | -3.8665  | 8.47E-08 | 1.56E-07 |
| C2orf78  | 2.977967 | -3.81155 | 8.93E-08 | 1.65E-07 |
| OR52E6   | 2.523201 | -4.05801 | 1.01E-07 | 1.85E-07 |
| RLBP1    | 2.210583 | -1.39348 | 1.02E-07 | 1.87E-07 |
| HELT     | 2.584974 | -4.19162 | 1.08E-07 | 1.99E-07 |
| C1orf141 | 2.467233 | -4.0497  | 1.14E-07 | 2.09E-07 |
| FGB      | 3.212131 | 4.295909 | 1.15E-07 | 2.11E-07 |
| MUC21    | 2.524418 | -0.92659 | 1.27E-07 | 2.32E-07 |
| ZPBP2    | 2.29397  | -2.95157 | 1.29E-07 | 2.36E-07 |
| CHRN3    | 2.14319  | -4.17012 | 1.32E-07 | 2.41E-07 |
| PRB2     | 2.285564 | -3.39611 | 1.35E-07 | 2.46E-07 |
| DMBT1    | 2.090419 | 2.622626 | 1.48E-07 | 2.68E-07 |
| ZNF560   | 2.164966 | -1.73256 | 1.53E-07 | 2.78E-07 |
| KRT78    | 2.416916 | -1.87271 | 1.55E-07 | 2.82E-07 |
| ALPG     | 2.132763 | -4.23581 | 1.56E-07 | 2.83E-07 |
| BARHL2   | 2.523352 | -3.77602 | 1.82E-07 | 3.29E-07 |
| CPN1     | 2.980899 | -3.9245  | 2.08E-07 | 3.75E-07 |
| PSG11    | 3.665926 | -2.96674 | 2.58E-07 | 4.63E-07 |
| CST11    | 2.092988 | -3.54096 | 2.70E-07 | 4.84E-07 |
| 11-Mar   | 2.189896 | -0.8615  | 2.72E-07 | 4.87E-07 |
| HRG      | 2.281917 | -3.71576 | 2.73E-07 | 4.88E-07 |
| FLG2     | 2.587002 | -1.31194 | 2.75E-07 | 4.93E-07 |
| HTR2C    | 2.528112 | -2.28278 | 2.97E-07 | 5.30E-07 |
| C6orf15  | 2.059105 | 2.104214 | 2.97E-07 | 5.31E-07 |
| PROKR2   | 2.628546 | -2.86043 | 3.17E-07 | 5.65E-07 |
| SPANXD   | 2.951506 | -4.19905 | 3.18E-07 | 5.67E-07 |
| FAM9A    | 2.58929  | -4.17594 | 3.23E-07 | 5.75E-07 |
| MAGEB10  | 2.800609 | -4.27232 | 3.27E-07 | 5.83E-07 |
| PRB4     | 2.493224 | -3.89738 | 3.60E-07 | 6.40E-07 |
| KRT6C    | 2.24549  | 1.527649 | 3.84E-07 | 6.82E-07 |
| C1orf94  | 2.653798 | -2.18215 | 3.86E-07 | 6.84E-07 |
| TMEM229  | 2.655111 | -3.33628 | 3.92E-07 | 6.94E-07 |
| ADAM7    | 3.077513 | -3.6395  | 4.13E-07 | 7.30E-07 |
| GLYATL3  | 3.742237 | -0.91159 | 4.30E-07 | 7.59E-07 |
| RALYL    | 2.518642 | -1.16244 | 4.50E-07 | 7.94E-07 |
| FGA      | 3.897568 | 3.471935 | 4.54E-07 | 8.02E-07 |
| LINC0220 | 2.820208 | -4.26997 | 4.94E-07 | 8.69E-07 |
| SERPIN3  | 3.588284 | 0.594429 | 4.99E-07 | 8.78E-07 |
| SPRR4    | 3.008388 | -4.19663 | 5.82E-07 | 1.02E-06 |
| OTX2     | 2.652352 | -3.88421 | 5.91E-07 | 1.04E-06 |
| PRDM14   | 2.256845 | -4.09407 | 6.04E-07 | 1.06E-06 |

|          |          |          |          |          |
|----------|----------|----------|----------|----------|
| UCMA     | 2.42906  | -4.25144 | 6.13E-07 | 1.07E-06 |
| SMR3A    | 4.294248 | -0.80971 | 6.53E-07 | 1.14E-06 |
| LCE1C    | 2.768936 | -1.87263 | 7.14E-07 | 1.25E-06 |
| PRODH2   | 2.593613 | -3.66485 | 7.19E-07 | 1.25E-06 |
| SPRR1B   | 3.147629 | 0.867924 | 7.77E-07 | 1.35E-06 |
| KRTAP3-3 | 2.905429 | -1.80953 | 9.42E-07 | 1.63E-06 |
| VCX2     | 2.28023  | -4.21479 | 1.02E-06 | 1.77E-06 |
| SERPINA6 | 2.314435 | 5.537089 | 1.08E-06 | 1.87E-06 |
| ISX      | 2.93735  | -1.27157 | 1.27E-06 | 2.19E-06 |
| C11orf97 | 2.090824 | -3.97982 | 1.30E-06 | 2.23E-06 |
| MAGEA9B  | 3.529103 | -2.62283 | 1.58E-06 | 2.71E-06 |
| AL035425 | 3.466294 | -2.72736 | 1.59E-06 | 2.72E-06 |
| PRM1     | 3.392815 | -3.97771 | 1.72E-06 | 2.92E-06 |
| RBMXL2   | 2.263523 | -3.39959 | 1.76E-06 | 2.99E-06 |
| MAGEB6   | 2.192839 | -4.25984 | 1.78E-06 | 3.03E-06 |
| KIR3DL3  | 2.161175 | -4.26587 | 1.80E-06 | 3.06E-06 |
| HCRTR2   | 2.037338 | -2.11989 | 2.01E-06 | 3.41E-06 |
| SERPINB1 | 3.260592 | -3.1477  | 2.81E-06 | 4.72E-06 |
| ALKAL1   | 2.360082 | -3.06229 | 3.47E-06 | 5.79E-06 |
| DCAF8L1  | 2.430465 | -4.29906 | 3.73E-06 | 6.22E-06 |
| MTNR1B   | 2.318029 | -3.45386 | 3.92E-06 | 6.52E-06 |
| UGT2B10  | 2.216638 | -2.18785 | 3.93E-06 | 6.53E-06 |
| ESX1     | 2.693872 | -3.34349 | 4.01E-06 | 6.66E-06 |
| MAGEB1   | 2.449065 | -2.14456 | 4.73E-06 | 7.82E-06 |
| SPRR2D   | 3.48995  | -0.50302 | 5.05E-06 | 8.33E-06 |
| SERPINA7 | 2.59013  | -4.25567 | 5.46E-06 | 8.98E-06 |
| TBC1D21  | 2.580355 | -3.91346 | 5.94E-06 | 9.74E-06 |
| PRSS48   | 2.050716 | -3.14453 | 6.95E-06 | 1.13E-05 |
| FABP1    | 2.419677 | -1.82977 | 7.75E-06 | 1.26E-05 |
| SLC6A5   | 2.239338 | -4.05477 | 7.88E-06 | 1.28E-05 |
| CGB5     | 2.319308 | -4.05539 | 8.53E-06 | 1.38E-05 |
| SLC17A4  | 2.174532 | -3.82974 | 9.10E-06 | 1.47E-05 |
| OTOP3    | 2.00491  | -3.1281  | 9.95E-06 | 1.61E-05 |
| SNTG1    | 2.02657  | -2.78813 | 1.04E-05 | 1.68E-05 |
| LIPF     | 2.162193 | -1.70942 | 1.07E-05 | 1.72E-05 |
| FAM83C   | 2.308792 | -1.47253 | 1.35E-05 | 2.17E-05 |
| NAA11    | 2.438543 | -1.93895 | 1.98E-05 | 3.13E-05 |
| OR8A1    | 2.186623 | -4.14007 | 2.00E-05 | 3.16E-05 |
| TMIGD1   | 2.2669   | -3.74355 | 2.84E-05 | 4.45E-05 |
| KRT33B   | 2.043939 | -3.22607 | 3.08E-05 | 4.81E-05 |
| NTS      | 2.340407 | 4.754319 | 3.45E-05 | 5.38E-05 |
| SEMG1    | 2.346786 | -4.17928 | 3.96E-05 | 6.15E-05 |
| KRT77    | 2.096651 | 0.059956 | 4.04E-05 | 6.27E-05 |
| PASD1    | 2.309448 | -3.85341 | 4.32E-05 | 6.69E-05 |
| OTOP1    | 2.030208 | -4.23148 | 4.71E-05 | 7.27E-05 |
| GJD2     | 2.50536  | -3.73831 | 4.87E-05 | 7.52E-05 |
| TRIM43   | 2.140331 | -2.72753 | 5.95E-05 | 9.13E-05 |
| SLCO1B3  | 2.2538   | -3.19206 | 6.34E-05 | 9.70E-05 |
| MMP26    | 2.089252 | -3.99427 | 6.93E-05 | 0.000106 |
| MT1B     | 2.236501 | -4.00984 | 6.99E-05 | 0.000107 |
| F9       | 2.400833 | -3.47942 | 7.88E-05 | 0.00012  |
| DCAF12L1 | 2.147253 | -1.75203 | 9.14E-05 | 0.000138 |
| UGT1A6   | 2.292662 | -1.05813 | 0.000123 | 0.000184 |
| RPTN     | 2.004574 | -3.26745 | 0.000151 | 0.000224 |
| STATH    | 2.667203 | -2.94643 | 0.000174 | 0.000258 |
| CTAG2    | 2.437325 | -0.90957 | 0.000358 | 0.000518 |
| UGT1A10  | 2.110467 | -3.31511 | 0.000654 | 0.000931 |
| LACRT    | 2.27887  | 3.807247 | 0.00082  | 0.001157 |

|        |          |          |          |          |
|--------|----------|----------|----------|----------|
| XAGE5  | 2.039266 | -2.99504 | 0.001365 | 0.001894 |
| SPRR2E | 2.027184 | -0.73263 | 0.003132 | 0.004239 |
